1 **Clonal behaviour of myogenic precursor cells throughout the vertebrate lifespan.**

2

3 Simon M. Hughes<sup>1</sup>, Roberta C. Escaleira<sup>1,3</sup>, Kees Wanders<sup>1,4</sup>, Jana Koth<sup>1,5</sup>, David G. Wilkinson<sup>2</sup> and  
4 Qiling Xu<sup>2</sup>

5

6 <sup>1</sup> Randall Centre for Cell and Molecular Biophysics, School of Basic and Medical Biosciences, King's  
7 College London, UK.

8 <sup>2</sup> Francis Crick Institute, London NW1 1AT, UK

9

10 <sup>3</sup> current address Cellular Biology Laboratory, Biomedical Research Institute, Naval Hospital Marcílio  
11 Dias, Brazil

12 <sup>4</sup> current address Department of Biology, University of Bath

13 <sup>5</sup> current address MRC Weatherall Institute of Molecular Medicine, University of Oxford OX3 9DS

14

15 Running title: Somite clonal analysis with Musclebow

16

17 Keywords: muscle, zebrafish, stem cell, dermomyotome

18

19 Corresponding author: Simon M. Hughes, Randall Centre, New Hunt's House, Guy's Campus, King's  
20 College London, London SE1 1UL, UK. Tel.: +44 20 7848 6445; fax: +44 20 7848 6550; e-mail:  
21 s.hughes@kcl.ac.uk

22

23 Author's contributions:

24 QX and DGW designed and made the kg309 and kg310 transgenic fish. SMH isolated kg311 and  
25 kg321 lines, performed and analysed time-lapse experiments. JK performed the somite cell number  
26 experiment, which was analysed by SMH. RCE performed wounding and developmental analyses  
27 and bred kg330. KW maintained the fish and analysed kg330. SMH wrote the manuscript. SMH,  
28 RCE and DGW obtained funding.

29

30 **Summary Statement**

31 Musclebow clonal cell lineage analysis is introduced to reveal the cellular dynamics of skeletal  
32 muscle formation, repair and maintenance throughout the life of zebrafish.

33

34 **Abstract**

35 To address questions of stem cell diversity during skeletal myogenesis, a Brainbow-like genetic cell  
36 lineage tracing method, dubbed *Musclebow*, was derived by enhancer trapping in zebrafish. It is  
37 shown that at least 15 muscle precursor cells (mpcs) seed each somite, where they proliferate but  
38 contribute little to muscle growth prior to hatching. Thereafter, dermomyotome-derived mpc clones  
39 rapidly expand while some progeny undergo terminal differentiation, leading to stochastic clonal drift.  
40 No evidence of cell lineage-based clonal fate diversity was obtained. Neither fibre nor mpc death  
41 was observed in uninjured animals. Individual marked muscle fibres persist across much of the  
42 lifespan indicating low rates of nuclear turnover. In adulthood, early-marked mpc clones label stable  
43 blocks of tissue comprising a significant fraction of either epaxial or hypaxial somite. Fusion of cells  
44 from separate early-marked clones occurs in regions of clone overlap. Wounds are regenerated  
45 from many/most local mpcs; no evidence for specialised stem mpcs was obtained. In conclusion,  
46 our data indicate that most mpcs in muscle tissue contribute to local growth and repair and suggest  
47 that cellular turnover is low in the absence of trauma.

48

49 **Introduction**

50 Gradual cell lineage restriction is a major determinant of animal development. Understanding cell  
51 lineage origins and diversity is also important for designing regenerative stem cell therapies. Clonal  
52 analyses have revealed the importance of cell lineage-based behaviours in vertebrates in polarised  
53 epithelial tissues such as skin, gut and central nervous system, with stem cell clones occupying a  
54 specific niche and contributing to a defined cascade of progeny in a defined planar spatial domain.  
55 In contrast, much less is known in mesenchymal tissues with a complex three-dimensional structure.  
56 Here, we show how clones of tissue-restricted stem cells contribute stably to patches of skeletal  
57 muscle tissue throughout the life of an animal.

58 Distinct myogenic precursor cell (mpc) lineages have long been proposed to be a major factor  
59 controlling vertebrate myogenesis (Cossu et al., 1988; Hauschka, 1974; Hughes and Salinas, 1999;  
60 Miller and Stockdale, 1986). Mpc clonal behaviour in cell culture first led to the suggestion that  
61 heritably-robust intrinsic differences exist between myoblast clones in embryonic muscles, and that  
62 these underpin cell fate decisions, such as the formation of slow and fast fibres (Schafer et al., 1987).  
63 Moreover, myoblast populations appear to change character as muscle matures, leading to the  
64 suggestion that distinct generations of fibres arise from distinct clones (Hauschka, 1974; Hutcheson  
65 et al., 2009; Messina et al., 2010). Clone lineage has also been proposed to control the timing of  
66 myoblast differentiation into muscle fibres (Quinn et al., 1985). The essence of these ideas is that

67 of commitment; that a cell (in this case a dividing myoblast) already knows what it will do at the next  
68 step in its development. Despite these indications of the importance of cell lineage in vertebrate  
69 myogenesis, in vivo evidence is sorely lacking.

70 Mature vertebrate muscle fibres are multinucleate, formed by the fusion of mononucleate myoblast-  
71 derived differentiating myocytes (Collins et al., 2005; Gearhart and Mintz, 1972; Stockdale and  
72 Holtzer, 1961). This fact complicates lineage analysis because transplantation and heterokaryon  
73 experiments all suggest that upon fusion of a myocyte to a pre-existing fibre, the myocyte nucleus is  
74 reprogrammed to copy the host fibre gene expression (Blau et al., 1985). Moreover, clonal analyses  
75 in vivo demonstrate that most amniote mpcs fuse randomly with fibres in their environment (Hughes,  
76 1999; Hughes and Blau, 1990; Hughes and Blau, 1992; Robson and Hughes, 1999). More recently,  
77 renewed interest in the lineage hypothesis has arisen from two observations. First, it is clear that  
78 muscle satellite cells, the tissue-restricted stem cells of muscle growth and repair in adult animals,  
79 are derived from the somite and share some, but not all, of their molecular characteristics with early  
80 myoblasts (Cossu et al., 1988; Gros et al., 2005; Kassam-Duchossoy et al., 2005). Secondly, muscle  
81 shows a remarkable robustness to genetic manipulations, suggesting that extrinsic signals can, in  
82 appropriate circumstances, override the intrinsically-encoded destiny of a myoblast (Haldar et al.,  
83 2008). Although distinct populations of differentiated muscle fibres have been suggested to be  
84 formed from committed but proliferative mpc sub-populations, evidence from unmanipulated  
85 endogenous mpcs is not compelling (DiMario et al., 1993; DiMario and Stockdale, 1995; Hughes,  
86 1999; Hughes and Blau, 1992; Motohashi et al., 2019). Recent efforts have employed Zebrow  
87 technology to analyse cell lineage during zebrafish muscle development and regeneration (Gurevich  
88 et al., 2016; Nguyen et al., 2017). These studies have shown that 1) a few clonally-related myoblasts  
89 contribute to muscle regeneration in larval somites (Gurevich et al., 2016) and 2) neutral clonal drift  
90 sometimes causes single stem cells to label large portions of the myotome as animals grow (Nguyen  
91 et al., 2017). Zebrow constructs have multiple insertions and express in all cell types, which can  
92 make tracing individual clones difficult (Nguyen and Currie, 2018). In order to test hypotheses  
93 implicating cell lineage as a regulator of muscle development, we developed an alternative approach  
94 in zebrafish that enabled analysis of mpc behaviour. We carried out an enhancer trap screen using  
95 the *Brainbow-1.0 'L'* construct (Livet et al., 2007) and found a line in which expression is restricted  
96 to somitic muscle lineages, which we term Musclebow. Recombination to generate different  
97 fluorescent colours was achieved by short heat shock induction of Cre recombinase expression.

98

99 Here we describe Musclebow lineage analysis of somite cells throughout the zebrafish lifespan.  
100 Using this approach, we tracked large numbers of single muscle fibres and somite cell clones over  
101 hours, weeks and years. We found that myocytes are initially highly dynamic during their  
102 differentiation from muscle stem cells, but then become stably incorporated into myotomal structure.  
103 Marked clones of motile mononucleate somitic cells disperse through the somite from the

104 dermomyotome, following stereotypical routes. Clones marked at embryonic stages are generally  
105 contained within single somites and contribute to regions of muscle constituting a broad zone of  
106 fibres. There is significant clonal drift over time, leading to large clones restricted to single contiguous  
107 regions of individual somites that appear stable throughout adult life.

108

## 109 **Materials and Methods**

### 110 **Zebrafish husbandry**

111 Transgenic lines were created on London/AB wild type background and backcrossed onto AB.  
112 Maintenance, staging and husbandry were performed as previously described (Westerfield, 2000).  
113 Lines used are listed in Table 1.

114

### 115 **Zebrafish Transgenesis**

116 Transgenic Musclebow zebrafish lines were made with a Tol2-based enhancer trap construct  
117 encoding three fluorescent proteins (tdTomato, mCerulean and EYFP) flanked by paired loxP and  
118 loxP2272 sites, under the control of a 1.2 kb *claudin-b* basal promoter (Fig. 1A), based on the  
119 *Brainbow-1.0 'L'* vector (Livet et al., 2007; Pan et al., 2013). One line generated, designated  
120 *Tg(BB3mus7)<sup>kg309</sup>*, had strong fluorescent signal in muscle fibres and weak signal elsewhere, each  
121 of which showed linked monogenic Mendelian transmission, and was analysed further. The  
122 tdTomato detected diminished with age of the fish, perhaps due to an integration site effect and/or  
123 overall reduction in transcription/translation rate in mature muscle fibres. Upon injection of RNA  
124 encoding Cre into *Tg(BB3mus7)<sup>kg309</sup>* embryos, both EYFP and mCerulean (mCer) marked cells were  
125 clearly visible, although the former were more abundant. mCer-marked cells generally appeared  
126 dimmer than EYFP-marked cells. A rare recombination event during outcrossing of  
127 *Tg(BB3mus7)<sup>kg309</sup>* to wild type created a subline with tdTomato expression more restricted to somites  
128 and muscle, and was designated *Tg(BB3mus7only)<sup>kg330</sup>* (Fig. S1). In general, *Tg(BB3mus7)<sup>kg309</sup>*  
129 larvae lacking the linked *Tg(BB3weak)* insertion present in the parental *kg309* allele were selected  
130 for experiments.

131 Separate Cre driver lines were generated using a construct in which the heat-shock-dependent *hs70-*  
132 *4* promoter drives Cre (Hans et al., 2011) and the  $\alpha$ -crystallin *cryaa* promoter drives RFP in the lens,  
133 permitting live identification of fish carrying the transgene from 2 dpf onwards (Fig. 1A). The  
134 *Tg(HS:Cre.cryaa:RFP)<sup>kg310</sup>* driver line was selected and shown to give Cre expression for around 1-  
135 3 h after heatshock at 39°C. The *Tg(HS:Cre.cryaa:RFP)<sup>kg310</sup>* driver was bred onto *Tg(BB3mus7)<sup>kg309</sup>*,  
136 in which it showed good recombination in a wide range of tissues after early heatshock (Fig. 1). Brief  
137 heatshocks of under 5 minutes gave relatively little recombination, permitting clonal analysis of cell  
138 fate. Expression of EYFP or mCer was observed in patches of muscle fibres. Transmission of

139 *Tg(HS:Cre.cryaa:RFP)<sup>kg310</sup>* from the mother without heatshock yielded germline recombinants  
140 expressing either EYFP (*kg311*) or mCer (*kg321*) widely in skeletal muscle, presumably due to Cre  
141 expression during chromosome restructuring in the oocyte (Figs 1B and S1). Therefore, in clonal  
142 analysis experiments, *Tg(HS:Cre.cryaa:RFP)<sup>kg310</sup>* was always delivered from the male parent.

143

#### 144 **Somite Cell Analysis**

145 RNA encoding Histone2B-mCherry (Shaner et al., 2004) was injected into *Tg(Ola.Actb:Hsa.HRAS-*  
146 *EGFP)<sup>vu119Tg</sup>* at the early one cell stage. To ensure that all nuclei were labelled in the analysed larvae,  
147 after scanning each fish was lightly fixed in 4% paraformaldehyde and stained for Hoechst 33342  
148 and re-scanned; although intensity varied, all blue nuclei were also red in the quantified larvae.  
149 Quantification was performed in Volocity by marking every nucleus and manually attributing each to  
150 either a fibre or mononuclear somitic cell (mnc) in the confocal stack. The presence of EGFP<sup>+</sup> T-  
151 tubule striations defined fibres. Point spread function of light in the Z-axis led to weaker but  
152 distinguishable plasma membrane signal when imaged *en face*.

153

#### 154 **Imaging and Data Processing**

155 Wholemount images were acquired with an Olympus DP70 camera on a Leica MZ16F dissecting  
156 microscope and confocal images were acquired in ZEN on a Zeiss LSM Exciter with a 40x/1.1 W  
157 Corr LD C-Apochromat objective for fixed specimens. For live time-lapse imaging with a Zeiss  
158 20x/1.0 W Plan-Apochromat, fluorescent embryos were mounted in 0.8-1% low melting point  
159 agarose (LMPA) in embryo medium (EM) containing 160 mg/L tricaine as an anaesthetic  
160 (Westerfield, 2000) in a Petri dish and covered with EM. Z-spacing was generally set to optimal for  
161 1 Airy unit. Tiff stacks were exported to Volocity 4.2-6.3 (Perkin Elmer) for further analysis and are  
162 shown as maximum intensity projections unless otherwise stated. EYFP and mCer persisted well  
163 during repeated scanning, whereas tdTomato faded faster.

164

#### 165 **Muscle Regeneration Assay**

166 Lesions were produced and regeneration monitored as described (Pipalia et al., 2016).  
167 *Tg(BB3mus7)<sup>kg309</sup>;Tg(HS:Cre.cryaa:RFP)<sup>kg310</sup>* larvae were embedded in 1% LMPA, imaged under  
168 Zeiss confocal, injured by needle-stick in selected epaxial somites and re-scanned at 1-2 hours post  
169 wound (hpw), released from LMPA and kept in a standard incubator at 28.5°C. At various time-points  
170 from 1-4 days post wound (dpw) injured larvae were re-embedded and scanned to trace the  
171 behaviour of marked cells during wound repair, being released from LMPA at least once every 24 h.

172

173 **Results**

174 ***Musclebow cell lineage tracing***

175 Musclebow transgenic fish were generated with Tol2-mediated enhancer trap (Fig. 1A). Transgene  
176 insertion of the BB3 construct led to *Tg(BB3mus7)<sup>kg309</sup>*, which initially expressed tdTomato (tdT) in  
177 what appeared to be a random subset of muscle fibres and mononucleate somitic cells (mncs, which  
178 in our definition do not include mononucleate muscle fibres) in larval fish (Fig. 1B). The *BB3mus7*  
179 transgene could undergo germline recombination to express either EYFP or mCer in the presence  
180 of a second transgene (*Tg(HS:Cre.cryaa:RFP)<sup>kg310</sup>*) expressing Cre recombinase and labelled the  
181 entire myotome (Fig. 1B). Later Cre expression led to multi-coloured muscle fibres (Fig. 1C).  
182 Importantly, mononucleate superficial slow fibres and mncs never contained both EYFP and mCer,  
183 indicating that only a single BB3 transgene was present at the *Tg(BB3mus7)<sup>kg309</sup>* enhancer-trap  
184 locus. The presence of fast fibres with a variety of colour combinations, including both EYFP and  
185 mCer, therefore indicates the fusion into single multinucleate fibres of nuclei expressing distinct  
186 colours (Fig. 1C-E). Expression was stable over time (Movie S1). Many marked mncs (either EYFP-  
187 or mCer-marked) appeared to be mncs based on their morphology and location (Fig. 1D; (Nguyen  
188 et al., 2017; Roy et al., 2017)). Marked mncs were arranged in clusters, suggesting a clonal origin,  
189 and tended to be brighter than neighbouring marked fibres, presumably due to their lower  
190 cytoplasmic volume concentrating the EYFP (Fig. 1D). Early-marked mnc clusters appeared to span  
191 one or several adjacent somites, but tended to be restricted to either epaxial or hypaxial domains  
192 (Fig. 1D). Mnc clusters labelled with mCer were rarer than those marked with EYFP, but mnc  
193 clusters of each colour were generally spatially well-separated (Fig. 1E). For example, examination  
194 of an entire confocal stack spanning somites 7 to 17 (S7-17) revealed only three ‘clusters’ of mCer-  
195 marked mncs, one of 13 cells restricted to the epaxial regions of S8+S9 (Fig. 1E), a second of 4 cells  
196 in the hypaxial extremes of S7+S8, and a third of 5 cells restricted to the hypaxial region of S12 (data  
197 not shown). The chance of this clustering of 22 marked cells into  $\leq 5$  out of 20 somitic halves is  
198  $< 1/10^6$ , strongly supporting a clonal origin of most cells in clusters. From static images, however,  
199 we cannot be certain that any individual cluster is clonal (two cells near to one another could have  
200 been converted to mCer independently), as we have shown in previous muscle lineage-tracing  
201 studies. Nevertheless, when clusters are well-spaced and of a single colour, behaviours of clusters  
202 that are often observed are highly likely to arise within single clones (Hughes and Blau, 1990; Hughes  
203 and Blau, 1992). Mnc clusters (either mCer- or EYFP-marked) were less frequent in more posterior  
204 somites, perhaps reflecting the graded decreases in somite size and cell number along the body  
205 axis. Mnc clusters were rare compared to marked fibres, a finding to which we return below.

206 *Tg(BB3mus7)<sup>kg309</sup>;Tg(HS:Cre.cryaa:RFP)<sup>kg310</sup>* fish were repeatedly analysed over periods of days  
207 and weeks through capture of 3D confocal stacks of a defined group of 3-4 somites, or 3D tile  
208 scanning of entire 31 somite blocks. Single marked muscle fibres identified at 3 dpf could be tracked  
209 into later stages with great confidence (Fig. 1G). Individual fibres identified in a specific region of an

210 early somite generally retained their shape, orientation and fluorescent protein expression at later  
211 stages. No cases of muscle fibre death were observed in many (>15) larvae examined by time-  
212 lapse, showing that fibre death is rare. Occasionally, identified fibres changed colour somewhat,  
213 relative to surrounding cells, presumably reflecting fusion of mpcs of a distinct colour to the tracked  
214 fibre (Fig. 1H). Labelled fibres were also observed in head and pectoral fin muscles (Fig. 1F).  
215 Germline recombined *Tg(BB3mus7EYFP)<sup>kg311</sup>* showed many intensely-marked mncs despite strong  
216 and rather uniform labelling in fibres (Fig. 1I). Marked mncs were in the typical locations of mpcs  
217 near horizontal and vertical myosepta, between fibres within the myotome and appeared to be  
218 forming nascent fibres at 5 dpf (Fig. 1I). We conclude that *Tg(BB3mus7)<sup>kg309</sup>* permits tracking of mpc  
219 proliferation and differentiation during growth of zebrafish skeletal muscle.

220

### 221 **Cell content of the larval somite**

222 To interpret clonal analyses quantitatively, it is advantageous to know the numbers of mncs, fibres  
223 and their nuclei within the somite. We therefore injected RNA encoding Histone2B-mCherry into  
224 *Tg( $\beta$ actin:Hras-EGFP)<sup>vu119Tg</sup>* fish to label nuclei red and plasma membrane green and analysed the  
225 cells within the somite at 3 dpf in high-resolution confocal stacks (Fig. 2). Fibres were readily  
226 distinguished from mncs by position and the presence of T-tubule striations (Fig. 2; Table 2). At this  
227 stage, 31 total mononucleate fibres were present in somite 16, of which around 23 were the  
228 superficial slow fibres. An additional 64 multinucleate fibres with an average of 3.0 nuclei/fibre gave  
229 a total fibre content of 96 fibres (Table 2). Fast fibres had between one and six nuclei, with a mean  
230 of 2.8 nuclei/fibre and a median and mode of 3 nuclei/fibre (Table 2). Mncs in somite 16 numbered  
231 89, 28% of total somitic nuclei. At 3 dpf, no mncs were detected within the body of the myotome;  
232 most mncs were in the dermomyotomal layer (60), particularly at the dorsal and ventral somite  
233 extremes, or at the vertical (17) or horizontal (12) myosepta (Fig. 2; Table 2). Epaxial and hypaxial  
234 regions of the somite had very similar cellular composition (Table 2). However, the hypaxial domain  
235 had slightly more and larger muscle fibres and slightly fewer mncs (Fig. 2; Table 2). While every  
236 effort was made to distinguish epi/peridermal cells from cells at the lateral somite surface, we cannot  
237 be confident that cells such as neural crest-derived xanthophores, located between somite and  
238 epidermis, were always excluded, as their flat morphology is similar to that of dermomyotome cells;  
239 such inclusion might contribute to the larger numbers of mncs observed in the epaxial domain.  
240 Based on analyses of fluorescently-marked xanthophores in somite 16 at this stage (Mahalwar et  
241 al., 2014; Pipalia et al., 2016), there might be up to six in epaxial and four in hypaxial domain.  
242 Analysis of other 3 dpf fish showed similar cell and nuclear numbers but varied between and within  
243 lays in parallel with the absolute size of the larvae and thus of somite 16 (Kelu et al., 2020). Thus,  
244 at 3 dpf, over two thirds of somitic nuclei are in terminally-differentiated muscle fibres, but around a  
245 quarter of all nuclei are in potentially-myogenic mncs.

246

## 247 **Clonal cell lineage analysis in Musclebow fish**

248 Previous analyses in 24 hpf somites have revealed ~40-50 Pax3/7-marked mpcs in each somite 12-  
249 16 (Hammond et al., 2007; Hollway et al., 2007; Seger et al., 2011; Windner et al., 2012), suggesting  
250 significant proliferation between 1 and 3 dpf if most mncs at 3 dpf are mpcs. Congruently, many  
251 mpcs are in the cell cycle over this period (Hammond et al., 2007; Roy et al., 2017; Seger et al.,  
252 2011; Stellabotte et al., 2007). To analyse the behaviour of mnc clones, cells were marked within  
253 early somites and their fates tracked (Fig. 3). Applying a brief heat-shock at or after 24 hpf led to  
254 many single labelled muscle fibres (Fig. 3A). Importantly, these included the mononucleate  
255 superficial slow fibres (SSFs) that can be identified by their superficial location, orientation parallel  
256 to the anteroposterior axis and large central nucleus and muscle pioneer slow fibres (MP) located at  
257 the horizontal myoseptum (Fig. 3B). SSFs and MPs are already terminally differentiated at the time  
258 of heat-shock (Devoto et al., 1996), indicating that Cre is active inside differentiated muscle cells.  
259 Consistent with this view, no discernible clustering of fibres of the same colour was observed shortly  
260 after heat-shock (Fig. 3B). Quantification revealed ~1.6 (range 0-4) marked SSFs and ~0.2 (range  
261 0-1) marked MP per somite at 3 dpf (Fig. 3C) indicating that <10% of slow fibre nuclei underwent  
262 recombination (Table 2). Recombination events in individual somites appeared to be randomly  
263 distributed, both in terms of fibre number and whether EYFP or mCer was expressed. A tendency to  
264 fewer recombined slow fibres in more caudal somites likely reflected the lower numbers of slow fibres  
265 as the trunk tapers into the tail (Fig. 3C). Thus, marked slow fibres represent separate recombination  
266 events.

267 Comparing numbers of recombined slow and fast fibres at 3 dpf showed that marked fast fibres were  
268 more numerous than slow, roughly in proportion to the ratios of their nuclei present at the time of  
269 heat-shock (Fig. 3A,C; Table 2). Within a larva, the numbers of marked slow and fast fibres were  
270 well-correlated, although separate larvae showed different recombination rates. Thus, within one  
271 animal, the chance of recombination appears similar for each nucleus. As muscle fibre nuclei are  
272 post-mitotic and unable to proliferate further, such marked fibres constitute a reference background  
273 pattern facilitating tracking of other marked clones.

274 In contrast to fibres, clusters of similarly-marked mncs were evident at 3 dpf (Fig. 3A,B) and over  
275 ensuing days contributed to many narrow elongated fibres, particularly in the hypaxial somitic  
276 extreme (Fig. 3D). The approximately 28% of somite nuclei in mncs at 3 dpf (Table 2) provide a  
277 significant pool for later muscle growth, and beg the question of their clonal origin over the preceding  
278 days. At one extreme, all somite mpcs might derive from a single original somite cell. At the other,  
279 all mpcs might have an independent origin as the somite formed. Marked mncs were rare in some  
280 somites and more abundant in others two days after heat-shock, averaging at 6.6 marked  
281 mncs/somite (Fig. 3C). This probably reflects stochastic recombination in the low numbers of cells



282 in a somite that have not formed muscle fibres at 24 hpf (Fig. 4A; (Devoto et al., 2006; Hammond et  
283 al., 2007; Hollway et al., 2007; Stellabotte et al., 2007)). Moreover, analysis of the distribution of  
284 marked mnCs across a population of embryos suggested all somites contained mnCs that could, on  
285 occasion, undergo recombination. Considering the 89 mnCs counted in somite 16 (Table 2), we  
286 deduce that around 7% (6.6/89) of mnCs are marked, a recombinant fraction similar to that of slow  
287 fibres and proving that mnCs within single somites derive from multiple clones. As the number of  
288 marked mnCs in individual somites ranged from one to 14, it appears that either different numbers of  
289 mnCs underwent recombination in each somite and/or individual marked mnc precursors show a  
290 range of proliferative behaviours prior to 3 dpf. Strong support for the latter view comes from the  
291 rarity and scattered distribution of mCer-marked mnc clusters, which nevertheless also contain 2-8  
292 cells/somite, as mentioned above. The similar cluster size, despite threefold lower overall frequency  
293 argues that many mnc clusters are clones.

294 Although there was a trend towards higher marked mnc numbers in the larger more rostral somites.  
295 mnc labelling was still rare (Fig. 3C). Clusters of marked mnCs were often restricted to single half  
296 somites (epaxial or hypaxial) and did not appear to cross the vertical myoseptum into adjacent  
297 somites (Fig. 4A), points to which we return below. Based on the frequency of fibre recombination  
298 and that of marked mnc clusters, we conclude that a pool of at least 15 cells generate the mnCs in  
299 each trunk somite 8-19.

300 Repeated imaging of individual fish revealed that clusters of marked mnCs persisted in specific  
301 regions within individual somites as fish matured, but showed varied behaviour. Such mnc clusters  
302 usually had a single colour, consistent with clonal origin (Figs 3A,B,D). Although clusters were rare  
303 in fish showing low recombination levels, over time clusters grew larger, consistent with proliferation  
304 of clones (Fig. 3C). Indeed, on occasion, short time-lapse movies captured cytokinesis of mnCs  
305 within a cluster (Fig. 4B). Quantification showed that mnc numbers rose in somites 11-16 by 70%  
306 on average between 3 and 6 dpf, although outcomes were heterogeneous. Marked mnc number in  
307 somite 11 dropped from 14 to 4, whereas in somite 15 it rose from 1 to 10 (Fig. 3C). A lack of change  
308 in mnc number was rare. Thus, the behaviour of marked mnCs is dynamic with apparently stochastic  
309 increases and decreases in cluster size.

310 Analysis of the distribution of mnc clusters suggested that the vast majority represent clones. As  
311 already mentioned, clusters were generally homogeneous in colour. For example, in one fish at  
312 3 dpf, only two out of nine somites analysed contained mCer-marked mnCs; somite 17 had a cluster  
313 of three mnCs in the ventral region but lacked EYFP-marked mnCs and somite 18 had one mCer-  
314 marked mnc in the hypaxial dermomyotome and one EYFP-marked mnc at the dorsal edge of the  
315 epaxial region. The chance of obtaining clustering of at least 3 out of 4 cells in the same half-somite  
316 if each mCer<sup>+</sup> mnc arose from an independent recombination is 0.012. However, mCer mnc clusters  
317 were, on average, both fainter and smaller than EYFP clusters, suggesting that the weaker blue label  
318 prevented detection of all cells in a clone; we therefore focussed on EYFP clusters. In one embryo,

319 for example, in which the dorsal half of all 31 somites was imaged at high resolution, only a single  
320 somite had marked mncs. Yet, this epaxial somite had at least four marked mncs. Assuming an  
321 equal number of target cells in each somite, the chance of each of these cells being a separate  
322 recombination event and yet being located in the same somite is  $(1/31)^{4-1}$  i.e.  $p < 4 \times 10^{-5}$ . Even the  
323 presence of two clones in this half somite is unlikely ( $p = 0.032$ ). Similar non-random distributions  
324 were observed in many embryos. Thus, we can be confident that, so long as overall numbers of  
325 marked mncs are low, most clusters are clones.

326 In summary, the data indicate that:

327 a) fewer than 10% of all mncs are marked within the analysed Musclebow larvae. This means that  
328 Cre recombination frequency is low – most mnc precursors did not become labelled (because brief  
329 heat shock activated low levels of Cre in just a few cells).

330 b) once recombined and expressing EYFP, mncs tend to retain expression over a significant period.  
331 Given that marked fibres remain stably labelled for weeks, we have no evidence for reporter  
332 shutdown once a cell is recombined and expressing the transgene at detectable levels.

333 c) mncs in somites arise from multiple original somite cells. When heat shock was applied shortly  
334 after somite formation, only a fraction of mncs in a subset of somites were labelled. This result  
335 indicates that many mncs are not derived from the marked mnc clones, and is consistent with the  
336 described abundance of Pax3/7-marked cells in somites at 24 hpf (Hammond et al., 2007; Stellabotte  
337 et al., 2007).

338 d) most somite mncs undergo divisions by 3 dpf. To label a small clone within a somite, several cell  
339 divisions of the original marked cell must have occurred in the two day period. As few somites  
340 contain single marked mncs (as would be expected if mncs became marked but did not divide), most  
341 mncs seem to divide between 1 and 3 dpf.

342 e) mncs rarely form new fibres between 1 and 3 dpf. The absence of marked elongated fibres next  
343 to mnc clones suggests few cells form new fibres. Fusion to large pre-existing fibres cannot be ruled  
344 out because EYFP would be expected to be greatly diluted immediately upon fusion, and might take  
345 time to re-accumulate to a high level.

346 In conclusion, our initial analysis of Musclebow fish provides robust data confirming the presence of  
347 numerous mncs in each somite that proliferate on the surface of the myotome and constitute a stem  
348 cell pool that accounts for a significant fraction of the nuclei, and likely a majority of the non-fibre  
349 nuclei, in the larval somite.

350

351 **Mncs fuse to most fast fibres between 3 and 7 dpf**

352 Musclebow allowed us to analyse the growth of the somitic myotome. The myotome grows by both  
353 increase in muscle fibre number (hyperplasia) and in muscle fibre size (hypertrophy) (Roy et al.,  
354 2017). However, the numerical increase in nuclei within fibres, and thus the total contribution of mpc  
355 terminal differentiation to growth has not been determined. Musclebow fish had marked mnc clusters  
356 in specific regions of particular somites (Fig. 4A). Detailed analysis of one such cluster showed not  
357 only increase in mnc number, but also terminal differentiation of mnCs into fibres (Fig. 4B). Both  
358 fusion into larger pre-existing unmarked fast fibres and elongation of marked mnCs into nascent  
359 fibres were observed within single clusters (Fig. 4B, blue and white arrowheads, respectively).  
360 Nascent fibres were defined by their thin and irregular transverse profile, extension for at least 70%  
361 somite length and were often located near the hypaxial or epaxial myotomal extremes (Fig. 3D).  
362 Quantification revealed up to fourfold increase in marked fast fibres between 3 and 6 dpf (Fig. 3C).  
363 In somite 14, for example, that had ten marked mnCs, seven fast fibres (two mCer<sup>+</sup> in epaxial  
364 myotome and five EYFP<sup>+</sup> of which four were hypaxial and one epaxial) and three nascent fibres (all  
365 EYFP<sup>+</sup> and in the hypaxial region) were marked at 3 dpf. By 6 dpf, there were 31 marked fibres in  
366 this somite, four mCer<sup>+</sup> in each of the deep epaxial and hypaxial regions, six EYFP<sup>+</sup> in the superficial  
367 epaxial domain and 17 EYFP<sup>+</sup> in the hypaxial domain. One fast fibre in the superficial hypaxial  
368 domain was mCER<sup>+</sup>EYFP<sup>+</sup>, indicating fusion between myocytes derived from distinct mnc clones. It  
369 seems likely that the three hypaxial nascent EYFP<sup>+</sup> fibres at 3 dpf matured into fast EYFP<sup>+</sup> fibres at  
370 6 dpf. Thus, at least ten additional EYFP<sup>+</sup> mnCs appear to have contributed to the ten additional  
371 hypaxial EYFP<sup>+</sup> fast fibres, and five EYFP<sup>+</sup> fibres were added in the epaxial domain. In addition to  
372 this contribution to pre-existing unmarked fibres, six superficial nascent EYFP<sup>+</sup> fibres arose, one in  
373 the epaxial and five in the hypaxial domain. Strikingly, at 3 dpf, six and four EYFP<sup>+</sup> mnCs existed in  
374 the epaxial and hypaxial domains of this somite and this had increased to nine and 15, respectively,  
375 by 6 dpf, correlating with the abundant increase in EYFP<sup>+</sup> fibres (Fig. 3C). Given the low frequency  
376 of labelling of mnCs at 3 dpf and the significant increase in marked fast fibres, to about a third of all  
377 fibres in some somites by 6 dpf, we conclude that most fibres receive extra nuclei derived from mnCs  
378 during this period.

379

### 380 **Stochastic clonal drift is common**

381 Across five tracked somites, the average increase in marked fast fibres was 244% and in marked  
382 nascent fibres was 663%, which contrasted with a meagre 15% increase in marked slow fibres (Fig.  
383 3C). Increase in marked fibres from 3 to 6 dpf generally correlated with the number of marked mnCs  
384 present at 3 dpf (Figs 3C, S2A). Increases in marked fibres were accompanied by a 70% increase  
385 in marked mnCs (Fig. 3C), indicating that mnCs were proliferating at a sufficient rate to both expand  
386 their population and contribute many terminally-differentiated myocytes to the adjacent myotome.

387 Although, on average, mnc numbers increase, in somite 11 we observed a reduction from 14 to four  
388 marked mncs between 3 and 6 dpf, even as marked fast fibres increased from 19 to 46 and nascent  
389 fibres from three to 14 (Fig. 3C). This observation suggests that significant clonal drift can occur  
390 when proliferation of marked mncs fails to keep pace with their terminal differentiation. Indeed,  
391 comparison of the behaviour of the epaxial and hypaxial domains of somite 11 make this point  
392 clearly. Among EYFP<sup>+</sup> mncs, 11 were epaxial and three hypaxial at 3 dpf. By 6 dpf, however, no  
393 EYFP<sup>+</sup> mncs were detected in the epaxial domain, whereas four were still present in the hypaxial  
394 domain. The loss of 11 mncs from the epaxial domain was accompanied by an increase in EYFP<sup>+</sup>  
395 fibres (both mature and nascent) of 23, from four to 27. In contrast, in the hypaxial domain, 15  
396 additional EYFP<sup>+</sup> fibres (from eight to 23) arose from the three original EYFP<sup>+</sup> mncs, which  
397 themselves increased to four. Thus, in the hypaxial domain 16 net EYFP<sup>+</sup> cells were added, whereas  
398 in the epaxial domain, although there was a similar increase of 12 EYFP<sup>+</sup> cells net, it was at the  
399 expense of the entire epaxial mnc population. Complete loss of marked mncs was not observed in  
400 other somite halves (Fig. 3C). Thus, our data show how stochastic clonal drift can rapidly alter cell  
401 lineage when clone sizes are small.

402

#### 403 **Uniform behaviour of mncs**

404 Regional analysis of the fate of marked mncs between 3 and 6 dpf revealed several trends. First,  
405 there was a clear positive correlation ( $r = 0.77$ ) between the number of marked mncs at 3 dpf and  
406 the number of newly-marked fibres accumulated between 3 and 6 dpf, which was discerned in both  
407 epaxial and hypaxial somite halves (Fig. S2A). Secondly, the presence of more marked mncs at  
408 3 dpf showed a mild negative correlation ( $r = -0.39$ ) with the number of extra mncs observed at 6 dpf  
409 (Fig. S2A), suggesting that regions with more mncs underwent less subsequent mnc proliferation.  
410 However, there was no correlation between the number of additional marked fibres and the number  
411 of extra marked mncs ( $r = -0.22$ ), suggesting that extra differentiation did not account for the  
412 reduction in mncs. These trends were apparent equally in epaxial and hypaxial domains.

413 At 3 dpf, most marked mncs (86%) were located on the surface of the dermomyotome. By 6 dpf, in  
414 contrast, although marked mncs had more than doubled in number, most (59%) were at medial or  
415 deep levels within the myotome, consistent with the mpc migration previously described (Roy et al.,  
416 2017). The increase in marked fibres at different depths within the myotome was similar and  
417 correlated with the number of mncs in each somitic region at 3 dpf (Fig. S2B). In contrast, the  
418 increase in marked mncs at different depths was uncorrelated with the number of initial marked  
419 mncs. We conclude that apparently stochastic mnc proliferation and differentiation accompanied by  
420 invasion of the myotome leads to an increase in marked fibres and mncs and contributes to myotome  
421 growth over the early post-hatching period.

422

423 **Clones contribute to large regions of adult myotome**

424 As some clones become large, their loss by stochastic neutral clonal drift is predicted to be less  
425 common (Klein and Simons, 2011). Congruently, live imaging of muscle clones in larval and adult  
426 animals revealed remarkable persistence and stability of clonal patterns. In a cohort of Musclebow-  
427 marked fish, blocks of muscle in individual somites were marked (Fig. 5A). Each fish showed a  
428 distinct pattern; marking was more common in trunk than tail, perhaps reflecting an increased  
429 number of mpcs in the larger trunk somites. No concordance was observed between somites on left  
430 and right sides of the animals. Marked muscle blocks ranged from a few tens of fibres to many  
431 hundred (Fig. 5A). As the *BB3mus7* line was made by Tol2-mediated insertion, it is anticipated to  
432 contain only a single copy of the BB3 transgene in the locus. Consistent with this, we find two  
433 primary colours of marked cell cluster: yellow (EYFP) or blue (mCer) (Fig. 5B). On rare occasions  
434 yellow and blue clusters partially overlap, showing that more than one early mpc contributes  
435 significantly to muscle growth in all regions observed (Fig. 5B,C). Although EYFP-marked regions  
436 were more numerous than mCer-marked regions, they displayed similar patch/clone sizes (Fig.  
437 5B,C). This observation is consistent with the biased recombination in favour of EYFP observed in  
438 larvae.

439 Where EYFP and mCer clones overlapped, some fibres contained both mCer and EYFP, whereas  
440 other single neighbouring fibres were uniquely marked, indicating that distinct clones gave rise to  
441 progeny that fused, as observed earlier in development (Figs 3 and 5B,C). Individual marked fibres  
442 within a myotome differed in EYFP intensity, consistent with the view that each region contained a  
443 mixture of marked and unmarked myoblasts whose fusion generated cells with differing levels of  
444 marker (Fig. 5D). These findings confirm that multinucleate fibres are generally formed by fusion of  
445 myoblasts from distinct clones.

446 Although hypaxial flank muscle was more readily imaged in adult fish than either epaxial or  
447 appendicular muscle, we observed no consistent difference in mpc behaviour in any muscle. Marked  
448 patches of both epaxial and, separately, hypaxial muscle were restricted to single  
449 myotomes/myotome domains, indicating that clones arise within single somites and their progeny do  
450 not significantly traverse the vertical myosepta throughout life (Fig. 5C). Similar regionalisation of  
451 clonal marking was observed in appendicular muscle (Fig. 5E).

452 Fibres both deep and superficial within the somite were marked in many clones, as reflected by their  
453 plane of focus and orientation to the body axis (Fig. 5D). Repeated imaging revealed that, once  
454 established during embryonic and larval growth, the marked regions did not notably change size  
455 (Fig. 5C,F). Nor did new labelled clones arise, suggesting that a) new recombination events due to  
456 leakage of the *HS:Cre* transgene are rare or do not occur during adult life and b) that either cell  
457 turnover was minimal or that the cells involved in muscle repair remained close to their clonally-  
458 related fibre. Moreover, individual fibres that were particularly bright, and therefore stood out from

459 the group, were observed to persist for years (Fig. 5F). Thus, if there is significant on-going muscle  
460 repair during life in our aquarium, the clones that originally gave rise to normal muscle growth also  
461 contributed to muscle repair.

462

### 463 **Clonal analysis in muscle regeneration**

464 To probe mpc behaviour during muscle regeneration, needle lesions were made in somitic muscle  
465 of 3-4 dpf *BB3mus7;HS:Cre.cryaa:RFP* fish in epaxial somite adjacent to regions containing clusters  
466 of EYFP-marked mncs within the body of the myotome (Fig. 6A). The clusters were likely clones  
467 because adjacent somites lacked EYFP mncs. For example, the animal shown in Fig. 6B-G had  
468 marked mnc clusters in just two of the 11 half somites scanned prior to wounding, which was  
469 representative of the whole larva. As the clusters had seven and eight mncs, respectively, the  
470 chance of this distribution arising without clonal relationship is approximately  $p = (2/11)^{13} = 2 \times 10^{-10}$ .  
471 Further, the probability that each cluster is a single clone is  $p \geq 0.74$  (the chance that, if there were  
472 even three marked clones, they would each be in separate somites). We can therefore examine the  
473 contribution of mnc clones arising during development to wound repair.

474 Comparison of confocal stacks immediately before and after wounding showed loss of some marked  
475 fibres (Fig. 6C asterisk), but persistence of other fibres (Fig. 6C-E white dot and arrowhead) and  
476 adjacent marked mncs (Fig. 6C-F white arrows). The same somite was then imaged daily during  
477 wound repair, and a number of striking cell behaviours were observed. First, marked mncs near the  
478 lesion contributed to regenerating fibres (Fig. 6E-G white arrows). Second, numbers of marked mncs  
479 did not detectably increase. Instead, mncs present on the day of wounding were often replaced by  
480 marked nascent fibres at 1 dpw (Fig. 6D,E white arrow). Such fibres matured and increased in size  
481 over subsequent days (Fig. 6F,G white arrows). These observations suggest that most marked  
482 mncs are mpcs and contribute rapidly to repair of damaged muscle.

483 We next asked whether regeneration occurred from rare stem cells within the somite, or was derived  
484 from a wider range of mpcs present prior to lesion. Regions of unlabelled fibres present within the  
485 regenerating domain suggested that distinct unlabelled mncs regenerated such fibres (Fig. 6G, blue  
486 arrowheads). Across a series of seven somites containing marked mncs, we observed appearance  
487 of marked fibres in the regenerated region in all cases (Table 3). On some occasions the marked  
488 mncs contributed to only a few fibres, but on other occasions the marked mncs gave rise to an  
489 increasingly large region of strongly EYFP<sup>+</sup> regenerated fibres (Fig. 6G; Movie S2). Occasionally,  
490 newly-labelled fibres were observed in adjacent somites (Fig. 6F red arrowhead; Movie S2). In  
491 general, there was a positive correlation between the number of marked mncs prior to wounding and  
492 the extent of marked regenerated tissues (Table 3). In a second example, a single large regenerated  
493 fibre received contribution from two separate clones, respectively marked with mCer and EYFP (Fig.

494 6H-K). These findings show that multiple mpcs present within a single somite at the time of wounding  
495 contribute to wound repair.

496

## 497 **Discussion**

498 We have investigated clonal cell behaviour during both the growth and repair of zebrafish muscle in  
499 the initial phases of myogenesis and in adult life. Our findings reveal that: 1. A cohort of early non-  
500 proliferative mpcs generate the early myotome. 2. Marked mpc clones contribute little to muscle  
501 growth prior to hatching. 3. At 3 dpf when larvae have hatched, around 25% the nuclei in a single  
502 somite are in mncs. 4. From 3-6 dpf, dermomyotome-derived mpc clones rapidly expand while some  
503 progeny undergo terminal differentiation. 5. Neither fibre nor mpc death was observed in uninjured  
504 animals. 6. Individual marked muscle fibres persist across much of the lifespan indicating low rates  
505 of nuclear turnover. 7. In adulthood, early-marked clones label stable blocks of tissue comprising a  
506 significant fraction of either epaxial or hypaxial somite, in one or a few adjacent somites. 8. Fusion  
507 of cells from separate early-marked clones occurs in regions of clone overlap. 9. Wounds made  
508 next to marked mpc clones are regenerated partially from the marked cells, suggesting that  
509 many/most mpcs (both marked and unmarked) within a muscle block contribute to local wound  
510 repair.

511

## 512 ***Variation in clonal persistence during embryonic myogenesis***

513 Our analysis revealed no clustering of labelled early embryonic myofibres with similarly-labelled mnc  
514 clones. This finding confirms the observations from dye-filling experiments that most early somitic  
515 cells differentiate directly into either of two early populations of slow and fast embryonic myofibres  
516 with little or no proliferation prior to 2 dpf (Devoto et al., 1996; Hirsinger et al., 2004; Hollway et al.,  
517 2007; Stellabotte et al., 2007). We nevertheless find that a small subpopulation of early-marked  
518 somitic cells persist as mncs, presumably derived from somite anterior border cells (Devoto et al.,  
519 2006; Hammond et al., 2007; Hollway et al., 2007; Stellabotte et al., 2007).

520 These mncs, numbering at least 15/somite, subsequently proliferate rapidly and generate mpc  
521 clones within which individual cells undergo terminal differentiation into muscle fibres after hatching.  
522 Other cells in the same marked mpc clones remain as proliferative mncs at least until 13 dpf, the  
523 longest timelapse we have performed. Many such marked-mnc clusters are initially located  
524 superficially within the somite in the region described variously as dermomyotome or external cell  
525 layer (Devoto et al., 2006).

526 We did not observe marked mnc clusters generating both muscle fibres and another obvious distinct  
527 non-myotomal cell type, such as sclerotome or dermis. Although the *BB3mus7* Musclebow  
528 transgene does not express in non-myogenic tissue, one would expect perdurance of EYPF and

529 mCcr marker proteins for some days, as we have seen with a *pax7a*-driven GFP transgene (Pipalia  
530 et al., 2016). We therefore hypothesise that most early dermomyotomal cells have the capacity to  
531 make proliferative mpcs but do not generate abundant non-myogenic types, at least in the midbody  
532 regions and larval stages we have mainly investigated.

533 Our analysis of the cellular content of the zebrafish larval somite begins a quantitative understanding  
534 of proliferation, differentiation and growth of cells within this defined tissue block. Change in number  
535 of som16 mncs from around 40 Pax3/7+ve mpcs at 24 hpf (Hammond et al., 2007), to about 90 mncs  
536 at 72 hpf suggests proliferation. Indeed, proliferation was observed in marked mnc clones. We  
537 previously showed that each som12-16 has around  $271 \pm 19$  nuclei at 24 hpf, and that both Pax3/7+  
538 and Pax3/7- cells within the somite proliferate as indicated by phospho-Histone H3 and EdU staining  
539 (Hammond et al., 2007; Roy et al., 2017). Given that som12 is larger than som16 throughout  
540 development, and that our current data indicate that som16 has 301 nuclei at 3 dpf, the data suggest  
541 that mncs have proliferated and the nuclei generated have been retained within the somite. Indeed,  
542 based on Myogenin co-expression, we have previously shown that Pax3/7+ve mncs are undergoing  
543 differentiation into fibres at 3 dpf and beyond (Roy et al., 2017). Moreover, proliferation of mnc  
544 clones and increase in mnc numbers occurs between 1 and 3 dpf. Thus, an increase in mncs,  
545 despite some differentiation into fibres is likely. Making the modest assumptions that i) som16 had  
546 240 cells at 24 hpf rising to 300 at 3 dpf, ii) most proliferating cells within the somite are mpcs and  
547 iii) that all new fibre nuclei arise from mpcs within the somite, calculation suggests that on average  
548 60% of mpcs divide each day whereas just 6.25% differentiate each day in embryonic somites.

549 Marked-mpc clones show heterogenous behaviour in larval life. Some marked-mpc clones  
550 contribute to small presumed-nascent fibres, particularly at the dorsal and ventral somitic extremes  
551 after 3 dpf. Other marked mpc clones given rise to cells that invade the myotome after about 3 dpf  
552 and then contribute to pre-existing fast fibres through cell fusion. Many marked mncs show little  
553 division, whereas some proliferate well above average. Although, we have not yet analysed  
554 sufficient clones in detail, our data are consistent with the view that the decision between  
555 proliferation, migration and terminal differentiation within mpc clones is indeterminate and stochastic.  
556 By this we mean that either it is a truly probabilistic process intrinsic to the mpc, or that acute local  
557 cues influence the decision, for example signals from nearby fibres.

558

### 559 ***Cell death is rare during muscle development***

560 In amniotes, cell death is often employed to control cell numbers, drive morphogenesis, and correct  
561 errors in developmental progression. For example, approximately twice the required final number of  
562 motoneurons are generated, with half dying after the initial innervation of target muscle fibres ((Buss  
563 et al., 2006) and references therein). During the course of our studies some thousands of  
564 individually-marked and identifiable muscle fibres and mncs were examined. No instances of



565 marked-cell disappearance, fibre thinning/atrophy, fibre detachment from somite borders or  
566 phagocytosis were observed, suggesting that cell death within early myogenic lineages is not  
567 generally employed to sculpt myogenic progression in zebrafish.

568

### 569 ***No apparent cell lineage basis for early myogenesis***

570 Studies over fifty years have suggested that myoblast intrinsic heterogeneity could underlie formation  
571 of distinct muscle fibre types and/or generations (Cossu et al., 1988; Hauschka, 1974; Hughes and  
572 Salinas, 1999; Miller and Stockdale, 1986). One motivation for the development of Musclebow was  
573 the hope of revealing diverse populations of mpcs showing distinct categories of behaviour during  
574 the early phases of myogenesis, which have been hard to examine in amniotes. No such diversity  
575 has been apparent to date; while diverse, clones differ in behaviour over a smooth spectrum in all  
576 respects considered. We note, however, that the number of clones examined and the duration of  
577 time-lapse observations in our initial study is limited. Therefore, divergent mpc lineages present at  
578 low abundance or in locations difficult to image, such as dorsal and ventral somitic extremes, may  
579 not have been sufficiently sampled. Moreover, almost all amniote studies have been performed on  
580 limb muscle, whereas we have focused on intrinsic somitic muscle, which is homologous to the deep  
581 muscle of the back.

582

### 583 ***Clonal drift and persistence in adult life***

584 Time-lapse imaging in early larval development reveals variation in mpc clonal behaviour, such that  
585 some clones become large, while others fail to endure as mpcs. We find no reason not to interpret  
586 this observation as the result of stochastic clonal drift. After larval growth and into the adult stage,  
587 such large mpc clones give rise to patches of marked muscle fibres extending over significant  
588 portions of the epaxial or hypaxial myotome. As adult zebrafish muscle fibres have hundreds of  
589 nuclei (Ganassi et al., 2020), it is likely that small numbers of fusing nuclei from a marked mpc clone  
590 can label essentially all fibres in a region. Regions of overlap between fibres labelled with both EYFP  
591 and mCer prove that adult fibres are of multiclonal origin.

592 Adjacent somites on the anteroposterior axis, somites at the same anteroposterior position on left  
593 and right sides, and epaxial and hypaxial domains of single somites appear not to share large mpc  
594 clones. Labelling of adjacent regions is what might be expected by the chance of coincident  
595 recombination, suggesting that mpcs rarely cross the vertical or horizontal myosepta during normal  
596 life.

597 Once a large region of a myotome is labelled, that labelling persists throughout life and does not  
598 appear to spread. In principle, such observations could reflect either low turnover of muscle nuclei  
599 or that once marked mpcs have become abundant they perdure throughout life and contribute to

600 ongoing regeneration in the same region that they originally marked fibres. However, as wounding  
601 studies ((Gurevich et al., 2016) and see below) suggest that single mpc clones can make significant  
602 contribution to larval muscle wounds through clonal drift, our observations suggest that regeneration  
603 is not extensive in adult life. If such regeneration were occurring, a gradual expansion of at least  
604 some marked regions would be expected, which was not observed. Moreover, single strongly-  
605 marked fibres in locations such as the ventral body wall favourable for adult imaging, were observed  
606 to endure for years. These observations strongly argue that turnover in adult zebrafish muscle is  
607 not extensive, as had been described in humans (Spalding et al., 2005).

608

### 609 ***Multiple nearby mpcs contribute to muscle regeneration***

610 Wounds made next to marked mpcs are generally regenerated with a partial contribution of the  
611 marked cell to the repaired fibres, so long as the marked mpc survived the wounding procedure.  
612 Given the low rate of mpc marking by Musclebow, our data argue against the existence in larval life  
613 of a minor population of stem mpcs responsible for most fibre regeneration, as has previously been  
614 suggested (Gurevich et al., 2016). As such stem cells would have been unmarked in most wounded  
615 somites, the regenerated fibres would rarely be marked; this was not the case. Moreover, we  
616 observe regeneration of wounds in which only a fraction of fibres within the regenerated region are  
617 labelled, again arguing for polyclonal mpc regeneration and against a unique regenerative stem cell.  
618 How, then, could the clear-cut appearance of monoclonal regeneration (Gurevich et al., 2016) have  
619 arisen? We suggest that i) widespread labelling of mpcs from *msgn1:CreERT2* (which is only  
620 expressed in early presomitic mesoderm (<http://zfin.org/ZDB-GENE-030722-1/expression>), ii)  
621 recombination bias towards EYFP in *ubi:ZebraBow* similar to what we observe in *BB3mus7*  
622 Musclebow (both ZebraBow and Musclebow are based on the same *Brainbow-1.0 'L'* vector (Pan et  
623 al., 2013)) and iii) clonal drift during early life led to the erroneous conclusion of clonal regeneration  
624 (Gurevich et al., 2016). Similarly, regeneration in adult mammalian muscle is clearly polyclonal  
625 (Tierney et al., 2018).

626

### 627 ***Novel Musclebow technology***

628 By using a heat-shock promoter to trigger recombination in individual cells irrespective of their  
629 intrinsic gene expression, our approach differs from those employing cell type-restricted Cre  
630 expression (Gurevich et al., 2016; Nguyen and Currie, 2018; Nguyen et al., 2017). Instead, our cell  
631 labelling is driven by insertion of an enhancer trap vector into a genomic locus. Reverse PCR with  
632 Tol2 primers has suggested that the *BB3mus7* transgene is inserted into a common genomic repeat  
633 element that has so far precluded unambiguous mapping. [XXGenetic mapping reveals that in our  
634 line the BB3 transgene insertion is located in an intron of the *brsk2a* gene on chromosome 25 that  
635 may have undergone some rearrangement. As expression of *brsk2a* is not normally restricted to

636 myogenic tissue, it is possible that the reorganized locus may have facilitated an interaction of a  
637 normally distant muscle enhancer with the BB3 basal promoter.] In addition, a second copy of the  
638 BB3 transgene may be present in a linked locus and show widespread low level expression.  
639 Nevertheless, as we have recently been able to separate the two loci by extensive outcrossing, we  
640 think additional copies do not contribute to muscle labelling significantly. The *BB3mus7* line may  
641 prove useful in a variety of situations, such as transplantations or lineage tracing studies, where  
642 marking of mpcs and fibres is required.

643

#### 644 **Acknowledgements**

645 We thank Hughes lab members, Esperanza Hughes-Salinas, and the staff of the NIMR, Francis  
646 Crick Institute and KCL fish facilities.

647

#### 648 **Competing Interests**

649 All authors declare they have no financial or competing interests.

650

#### 651 **Funding**

652 This work was funded by the Medical Research Council (MRC) and a fellowship to RCE from  
653 Brazilian Navy and Conselho Nacional de Desenvolvimento Científico e Tecnológico (CNPq). SMH  
654 is an MRC Scientist with Programme Grant G1001029, MR/N021231/1 and MR/W001381/1 support.  
655 The Wilkinson lab is supported by the Francis Crick Institute which receives its core funding from  
656 Cancer Research UK (FC001217), the UK Medical Research Council (FC001217) and the Wellcome  
657 Trust (FC001217).

658

#### 659 **References**

660

- 661 **Blau, H. M., Pavlath, G. K., Hardeman, E. C., Chiu, C. P., Silberstein, L., Webster, S. G., Miller,**  
662 **S. C. and Webster, C.** (1985). Plasticity of the differentiated state. *Science* **230**, 758-766.
- 663 **Buss, R. R., Sun, W. and Oppenheim, R. W.** (2006). Adaptive roles of programmed cell death  
664 during nervous system development. *Annu Rev Neurosci* **29**, 1-35.
- 665 **Collins, C. A., Olsen, I., Zammit, P. S., Heslop, L., Petrie, A., Partridge, T. A. and Morgan, J.**  
666 **E.** (2005). Stem cell function, self-renewal, and behavioral heterogeneity of cells from the  
667 adult muscle satellite cell niche. *Cell* **122**, 289-301.
- 668 **Cooper, M. S., Szeto, D. P., Sommers-Herivel, G., Topczewski, J., Solnica-Krezel, L., Kang, H.**  
669 **C., Johnson, I. and Kimelman, D.** (2005). Visualizing morphogenesis in transgenic  
670 zebrafish embryos using BODIPY TR methyl ester dye as a vital counterstain for GFP. *Dev*  
671 *Dyn* **232**, 359-368.
- 672 **Cossu, G., Ranaldi, G., Senni, M. I., Molinaro, M. and Vivarelli, E.** (1988). 'Early' mammalian  
673 myoblasts are resistant to phorbol ester-induced block of differentiation. *Development* **102**,  
674 65-69.

- 675 **Devoto, S. H., Melancon, E., Eisen, J. S. and Westerfield, M.** (1996). Identification of separate  
676 slow and fast muscle precursor cells in vivo, prior to somite formation. *Development* **122**,  
677 3371-3380.
- 678 **Devoto, S. H., Stoiber, W., Hammond, C. L., Steinbacher, P., Haslett, J. R., Barresi, M. J.,**  
679 **Patterson, S. E., Adiarte, E. G. and Hughes, S. M.** (2006). Generality of vertebrate  
680 developmental patterns: evidence for a dermomyotome in fish. *Evol Dev* **8**, 101-110.
- 681 **DiMario, J. X., Fernyak, S. E. and Stockdale, F. E.** (1993). Myoblasts transferred to the limbs of  
682 embryos are committed to specific fibre fates. *Nature* **362**, 165-167.
- 683 **DiMario, J. X. and Stockdale, F. E.** (1995). Differences in the developmental fate of cultured and  
684 noncultured myoblasts when transplanted into embryonic limbs. *Experimental Cell Research*  
685 **216**, 431-442.
- 686 **Ganassi, M., Badodi, S., Wanders, K., Zammit, P. S. and Hughes, S. M.** (2020). Myogenin is an  
687 essential regulator of adult myofibre growth and muscle stem cell homeostasis. *Elife* **9**,  
688 e60445.
- 689 **Gearhart, J. D. and Mintz, B.** (1972). Clonal origins of somites and their muscle derivatives:  
690 evidence from allophenic mice. *Dev Biol* **29**, 27-37.
- 691 **Gros, J., Manceau, M., Thome, V. and Marcelle, C.** (2005). A common somitic origin for  
692 embryonic muscle progenitors and satellite cells. *Nature* **435**, 954-958.
- 693 **Gurevich, D. B., Nguyen, P. D., Siegel, A. L., Ehrlich, O. V., Sonntag, C., Phan, J. M., Berger,**  
694 **S., Ratnayake, D., Hersey, L., Berger, J., et al.** (2016). Asymmetric division of clonal  
695 muscle stem cells coordinates muscle regeneration in vivo. *Science* **353**, aad9969.
- 696 **Haldar, M., Karan, G., Tvrđik, P. and Capecchi, M. R.** (2008). Two Cell Lineages, myf5-  
697 Dependent and myf5-Independent, Participate in Mouse Skeletal Myogenesis. *Dev Cell* **14**,  
698 437-445.
- 699 **Hammond, C. L., Hinits, Y., Osborn, D. P., Minchin, J. E., Tettamanti, G. and Hughes, S. M.**  
700 (2007). Signals and myogenic regulatory factors restrict pax3 and pax7 expression to  
701 dermomyotome-like tissue in zebrafish. *Dev Biol* **302**, 504-521.
- 702 **Hans, S., Freudenreich, D., Geffarth, M., Kaslin, J., Machate, A. and Brand, M.** (2011).  
703 Generation of a non-leaky heat shock-inducible Cre line for conditional Cre/lox strategies in  
704 zebrafish. *Dev Dyn* **240**, 108-115.
- 705 **Hauschka, S. D.** (1974). Clonal analysis of vertebrate myogenesis. 3. Developmental changes in the  
706 muscle-colony-forming cells of the human fetal limb. *Dev Biol* **37**, 345-368.
- 707 **Hirsinger, E., Stellabotte, F., Devoto, S. H. and Westerfield, M.** (2004). Hedgehog signaling is  
708 required for commitment but not initial induction of slow muscle precursors. *Dev Biol* **275**,  
709 143-157.
- 710 **Hollway, G. E., Bryson-Richardson, R. J., Berger, S., Cole, N. J., Hall, T. E. and Currie, P. D.**  
711 (2007). Whole-somite rotation generates muscle progenitor cell compartments in the  
712 developing zebrafish embryo. *Dev Cell* **12**, 207-219.
- 713 **Hughes, S. M.** (1999). Fetal myoblast clones contribute to both fast and slow fibres in developing rat  
714 muscle. *Int J Dev Biol* **43**, 149-155.
- 715 **Hughes, S. M. and Blau, H. M.** (1990). Migration of myoblasts across basal lamina during skeletal  
716 muscle development. *Nature* **345**, 350-353.
- 717 ---- (1992). Muscle fiber pattern is independent of cell lineage in postnatal rodent development. *Cell*  
718 **68**, 659-671.
- 719 **Hughes, S. M. and Salinas, P. C.** (1999). Control of muscle fibre and motoneuron diversification.  
720 *Curr Opin Neurobiol* **9**, 54-64.
- 721 **Hutcheson, D. A., Zhao, J., Merrell, A., Haldar, M. and Kardon, G.** (2009). Embryonic and fetal  
722 limb myogenic cells are derived from developmentally distinct progenitors and have different  
723 requirements for beta-catenin. *Genes Dev* **23**, 997-1013.

- 724 **Kassar-Duchossoy, L., Giacone, E., Gayraud-Morel, B., Jory, A., Gomes, D. and Tajbakhsh, S.**  
725 (2005). Pax3/Pax7 mark a novel population of primitive myogenic cells during development.  
726 *Genes Dev* **19**, 1426-1431.
- 727 **Kelu, J. J., Pipalia, T. G. and Hughes, S. M.** (2020). Circadian regulation of muscle growth  
728 independent of locomotor activity. *Proc Natl Acad Sci U S A* **117**, 31208-31218.
- 729 **Kimmel, C. B., Ballard, W. W., Kimmel, S. R., Ullmann, B. and Schilling, T. F.** (1995). Stages  
730 of embryonic development of the zebrafish. *Developmental Dynamics* **203**, 253-310.
- 731 **Klein, A. M. and Simons, B. D.** (2011). Universal patterns of stem cell fate in cycling adult tissues.  
732 *Development* **138**, 3103-3111.
- 733 **Livet, J., Weissman, T. A., Kang, H., Draft, R. W., Lu, J., Bennis, R. A., Sanes, J. R. and**  
734 **Lichtman, J. W.** (2007). Transgenic strategies for combinatorial expression of fluorescent  
735 proteins in the nervous system. *Nature* **450**, 56-62.
- 736 **Mahalwar, P., Walderich, B., Singh, A. P. and Nüsslein-Volhard, C.** (2014). Local reorganization  
737 of xanthophores fine-tunes and colors the striped pattern of zebrafish. *Science* **345**, 1362-  
738 1364.
- 739 **Messina, G., Biressi, S., Monteverde, S., Magli, A., Cassano, M., Perani, L., Roncaglia, E.,**  
740 **Tagliafico, E., Starnes, L., Campbell, C. E., et al.** (2010). Nfix Regulates Fetal-Specific  
741 Transcription in Developing Skeletal Muscle. *Cell* **140**, 554-566.
- 742 **Miller, J. B. and Stockdale, F. E.** (1986). Developmental regulation of the multiple myogenic cell  
743 lineages of the avian embryo. *J. Cell Biol.* **103**, 2199-2208.
- 744 **Motohashi, N., Uezumi, A., Asakura, A., Ikemoto-Uezumi, M., Mori, S., Mizunoe, Y.,**  
745 **Takashima, R., Miyagoe-Suzuki, Y., Takeda, S. and Shigemoto, K.** (2019). Tbx1 regulates  
746 inherited metabolic and myogenic abilities of progenitor cells derived from slow- and fast-  
747 type muscle. *Cell death and differentiation* **26**, 1024-1036.
- 748 **Nguyen, P. D. and Currie, P. D.** (2018). Guidelines and best practices in successfully using  
749 Zebrow for lineage tracing multiple cells within tissues. *Methods* **150**, 63-67.
- 750 **Nguyen, P. D., Gurevich, D. B., Sonntag, C., Hersey, L., Alaei, S., Nim, H. T., Siegel, A., Hall,**  
751 **T. E., Rossello, F. J., Boyd, S. E., et al.** (2017). Muscle Stem Cells Undergo Extensive Clonal  
752 Drift during Tissue Growth via Meox1-Mediated Induction of G2 Cell-Cycle Arrest. *Cell stem*  
753 *cell* **21**, 107-119 e106.
- 754 **Pan, Y. A., Freundlich, T., Weissman, T. A., Schoppik, D., Wang, X. C., Zimmerman, S.,**  
755 **Ciruna, B., Sanes, J. R., Lichtman, J. W. and Schier, A. F.** (2013). Zebrow: multispectral  
756 cell labeling for cell tracing and lineage analysis in zebrafish. *Development* **140**, 2835-2846.
- 757 **Pipalia, T. G., Koth, J., Roy, S. D., Hammond, C. L., Kawakami, K. and Hughes, S. M.** (2016).  
758 Cellular dynamics of regeneration reveals role of two distinct Pax7 stem cell populations in  
759 larval zebrafish muscle repair. *Dis Model Mech* **9**, 671-684.
- 760 **Quinn, L. S., Holtzer, H. and Nameroff, M.** (1985). Generation of chick skeletal muscle cells in  
761 groups of 16 from stem cells. *Nature* **313**, 692-694.
- 762 **Robson, L. G. and Hughes, S. M.** (1999). Local signals in the chick limb bud can override myoblast  
763 lineage commitment: induction of slow myosin heavy chain in fast myoblasts. *Mech Dev* **85**,  
764 59-71.
- 765 **Roy, S. D., Williams, V. C., Pipalia, T. G., Li, K., Hammond, C. L., Knappe, S., Knight, R. D.**  
766 **and Hughes, S. M.** (2017). Myotome adaptability confers developmental robustness to  
767 somitic myogenesis in response to fibre number alteration. *Dev Biol* **431**, 321-335.
- 768 **Schafer, D. A., Miller, J. B. and Stockdale, F. E.** (1987). Cell diversification within the myogenic  
769 lineage: in vitro generation of two types of myoblasts from a single progenitor cell. *Cell* **48**,  
770 659-670.
- 771 **Seger, C., Hargrave, M., Wang, X., Chai, R. J., Elworthy, S. and Ingham, P. W.** (2011). Analysis  
772 of Pax7 expressing myogenic cells in zebrafish muscle development, injury, and models of  
773 disease. *Dev Dyn* **240**, 2440-2451.

- 774 **Shaner, N. C., Campbell, R. E., Steinbach, P. A., Giepmans, B. N., Palmer, A. E. and Tsien, R.**  
775 **Y.** (2004). Improved monomeric red, orange and yellow fluorescent proteins derived from  
776 *Discosoma* sp. red fluorescent protein. *Nat Biotechnol* **22**, 1567-1572.
- 777 **Spalding, K. L., Bhardwaj, R. D., Buchholz, B. A., Druid, H. and Frisen, J.** (2005). Retrospective  
778 birth dating of cells in humans. *Cell* **122**, 133-143.
- 779 **Stellabotte, F., Dobbs-McAuliffe, B., Fernandez, D. A., Feng, X. and Devoto, S. H.** (2007).  
780 Dynamic somite cell rearrangements lead to distinct waves of myotome growth. *Development*  
781 **134**, 1253-1257.
- 782 **Stockdale, F. E. and Holtzer, H. E.** (1961). DNA synthesis and myogenesis. *Exp. Cell Res.* **24**, 508-  
783 520.
- 784 **Tierney, M. T., Stec, M. J., Rulands, S., Simons, B. D. and Sacco, A.** (2018). Muscle Stem Cells  
785 Exhibit Distinct Clonal Dynamics in Response to Tissue Repair and Homeostatic Aging. *Cell*  
786 *stem cell* **22**, 119-127 e113.
- 787 **Westerfield, M.** (2000). *The Zebrafish Book - A guide for the laboratory use of zebrafish (Danio*  
788 *rerio)*: University of Oregon Press.
- 789 **Windner, S. E., Bird, N. C., Patterson, S. E., Doris, R. A. and Devoto, S. H.** (2012). Fss/Tbx6 is  
790 required for central dermomyotome cell fate in zebrafish. *Biology open* **1**, 806-814.
- 791
- 792
- 793
- 794
- 795

796 **Fig. 1. Musclebow fish allow genetic marking of muscle fibres and their precursor cells.**  
797 Transgenic Musclebow fish were selected from an enhancer trap screen with larvae at the indicated  
798 stages shown in lateral views with anterior to left, dorsal up. **A.** The BB3 and HS:Cre.cryaa:RFP  
799 DNA constructs used for making transgenic fish. **B.** Dissecting scope view of *BB3mus7<sup>kg309</sup>* yielding  
800 tdTomato detectable in a subset of muscle fibres from 1 dpf and *HS:Cre.cryaa:RFP<sup>kg310</sup>* yields RFP  
801 in lens from 2 dpf (arrow, top). Germline activity of *HS:Cre.cryaa:RFP<sup>kg310</sup>* yielded lines  
802 *BB3mus7:EYFP<sup>kg311</sup>* (EYFP, middle) or *BB3mus7:mCerulean<sup>kg321</sup>* (mCer, bottom) expressing  
803 throughout muscle tissue. **C.** Maximum intensity projection confocal stack (mip) after heat shock at  
804 30% epiboly yielding subsets of fibres expressing one or two recombined and unrecombined alleles,  
805 presumably reflecting mosaic Cre action followed by fusion of mpcs expressing *BB3mus7* in different  
806 recombination states. Note that recombination yielded EYFP fibres more frequently than mCer fibres  
807 and that some fibres remain unlabelled. **D.** Three channel confocal mip stack showing *BB3mus7*  
808 expression at 3 dpf in morphological slow (cyan arrows) and fast (green arrows) fibres and in mncs  
809 (arrowheads) in somites. Note the clustered mncs (green box, short stack shown magnified  
810 beneath). **E.** Single cluster of mCer-marked mncs (arrowheads) in somite 9. Yellow crosshairs  
811 indicate planes in XY, YZ and XZ projections. Inset shows location of cluster (white box). Note  
812 absence of mCer mncs in rest of plane. **F.** *BB3mus7* expression in pectoral fin muscles. **G.** Time-  
813 lapse analysis of short 20  $\mu\text{m}$  stack mips showing the persistent set of marked fibres (numbered) in  
814 the deep region of somites 15 and 16 at 3, 6 and 13 dpf. The 6 dpf stack extends further superficially  
815 within the myotome than the 3 and 13 dpf stacks. A cluster of mncs (bracket) appears in the deep  
816 myotome between 3 and 6 dpf and forms a nascent fibre (arrowhead) by 13 dpf. Note the loss of  
817 tdT in dual labelled fibres (asterisks) and the clonal growth of gut-associated cells (hashes). **H.**  
818 Time-lapse analysis of somite 11 shows maintenance of overall pattern of fibre labelling but changes  
819 in colour of some fibres (arrowheads). Note dramatic increase in EYFP-marked superficial mncs  
820 (arrows) in this somite which correlates with accumulation of extra EYFP-marked fibres (upper  
821 arrowheads). **I.** Confocal maximum intensity projection of 4 dpf *BB3mus7:EYFP<sup>kg311</sup>* larva with  
822 strong near-uniform signal in myotomal fibres and stronger signal in some mncs on myosepta  
823 (arrows) or within the myotome (arrowheads). Note the strongly-marked nascent fibres (magenta  
824 arrows). Bars = 50  $\mu\text{m}$ .  
825

826 **Fig. 2. Cell content of the growing zebrafish somite.**

827 Larvae expressing membrane-localized EGFP and injected with RNA encoding H2B-mCherry were  
828 selected for brightness of both labels and scanned live at high resolution using a sub-Airy pinhole.  
829 Three orthogonal views are shown, with blue lines on XZ and YZ projections indicating the six sagittal  
830 XY planes. Red and yellow lines indicate the XZ and YZ plane, respectively. Note that EGFP labels  
831 the transverse T-tubule system (white arrows) in muscle fibres at regular 2  $\mu\text{m}$  spacing orthogonal  
832 to the long axis of the fibre (purple box, magnified at left). Mononucleated fibres parallel to the  
833 anteroposterior axis on the surface of the myotome (white arrowheads) are superficial slow fibres.  
834 Fast fibres with multiple nuclei (magenta arrowheads) show different orientation depending on the  
835 depth within the myotome (magenta arrows); superficially they 'point' anteriorly, but in the medial  
836 myotome they 'point' posteriorly. NT neural tube.

837

838 **Fig. 3. *BB3mus7* recombination reveals dynamics of mpc clones.** Live confocal microscopy of

839 *BB3mus7<sup>kg309/+</sup>; HS:Cre.cryaa:RFP<sup>kg310/+</sup>* embryos after heat-shock at 24 hpf. **A.** Three channel  
840 confocal slice showing *BB3mus7* expression in somites 12-15 at 3 dpf in morphological slow (white  
841 arrowheads) and fast (other arrowheads) fibres and in mncs (white arrows) in somites. Note the  
842 clustered mncs. Examples of individual fibres marked by tdT-only (white arrowheads), EYFP-only  
843 (yellow arrowheads), mCer-only (cyan arrowheads), EYFP and tdT (orange arrowheads) and mCer  
844 and tdT (magenta arrowheads). Asterisk indicates autofluorescence from xanthophores in the mCer  
845 channel. Faint breakthrough of bright EYFP signal into the mCer detection channel that can be seen,  
846 for example, in the mncs and the fibre indicated by the orange arrowhead is readily distinguished  
847 from genuine mCer. **B.** Short stack (22  $\mu\text{m}$ ) mip of somites 12-14 at 3 dpf showing recombined mncs  
848 (arrows), superficial slow fibres (white arrowheads), muscle pioneers (magenta arrowheads), fast  
849 fibres (yellow arrowheads) and unrecombined slow fibres (cyan arrowheads). Note that some fibres  
850 contain both tdT and mCer or EYFP proteins, indicating perdurance of tdT after Cre-driven  
851 recombination. **C.** Quantification of numbers of marked cells in individual somites of a single fish at  
852 3 and 6 dpf, determined from high-resolution confocal stacks. Only somites 11-16 were scored at  
853 both timepoints. SSF, superficial slow fibre; MP, muscle pioneer slow fibre; mnc, mononuclear non-  
854 fibre cell; Fast, fast fibre with T-tubules; Nascent, thin nascent fibre spanning anteroposterior extent  
855 of somite. **D.** XYZ slice projections (indicated on mip at top left) of somites 10-13 at 6 dpf showing  
856 reduction in mncs and increase in elongated cells spanning the myotome marked with EYFP (white  
857 arrowheads) or mCer (blue arrowheads) within the hypaxial myotome. Coloured crosshairs indicate  
858 the plane of the orthogonal boxed optical sections. Bars = 50  $\mu\text{m}$ .

859

860

861

862



863 **Fig. 4. Kinetics of proliferation and differentiation of an EYFP-marked mnc cluster.** Time-lapse  
864 series taken from full somite three channel confocal stacks of a single Musclebow marked fish after  
865 heat-shock at 24 hpf. **A.** Full somite stack mip of tile scan of somites 9-18 showing five clusters of  
866 EYFP-marked mnCs (brackets) at 3 dpf. Note the large areas lacking marked mnCs and the more  
867 numerous marked fibres in anterior somites. **B.** Time-lapse confocal mips showing development of  
868 the mnc cluster in somite 14 of panel A. Boxes shown magnified at right. Note the i) early presence  
869 and later absence of EYFP-marked mnCs on the vertical myoseptum (arrows), ii) increase in number  
870 of marked mnCs, nascent fibres (blue arrowheads) and large fibres (white arrowheads) in the body  
871 of the myotome and iii) lack of increase in marked fibres in the adjacent region of somite 15 that also  
872 lacked marked mnCs (asterisks).

873

874 **Fig. 5. Stable clonal growth of muscle perdures throughout life. A,B.** Single 8 month adult  
875 Musclebow-marked fish that were heat-shocked for 5 min at 37°C at 30% epiboly show distinct  
876 patterns of EYFP-marked myotomes on left and right side and between epaxial and hypaxial somite  
877 (A). When the right side of the same fish was imaged for all four fluorescent proteins, this fish had  
878 faint tdT throughout muscle and RFP in lens, indicating Cre expression, that had triggered clonal  
879 marking of several half somites in either EYFP or mCer. Asterisks indicate background blue  
880 autofluorescence from xanthophores. Box, magnified in inset, shows regions of hypaxial myotomes  
881 11 and 14 marked by EYFP, whereas a region of somite 15 near the HZM is marked by mCer only.  
882 In a similar region of myotome 14, muscle is marked by both mCer and EYFP. **C-E.** Eight month  
883 old adult Musclebow-marked *BB3mus7* siblings (C) that were heatshocked for 5 min at 39°C at  
884 24 hpf. Note the similar size but lower frequency of mCer clones compared to EYFP clones in Fish  
885 6. Boxed region, magnified in D, reveals layers of fibres with distinct orientations (fibre ends  
886 indicated by pairs of arrowheads) and individual marked fibres (arrows). Ventral view of pectoral fin  
887 region of Fish 6 (E). **F.** Fish 1 from C at 15 and 32 months of age showing similar clonal pattern.  
888 Numbered boxes are magnified at right. Bar = 50 µm.

889

890

891

892

893

894

895

896

897

898

899 **Fig. 6. Partial contribution of clones to wound repair in zebrafish muscle.** **A.** Schematic of  
 900 wounding procedure (modified from (Kimmel et al., 1995)). A small needle wound was made near  
 901 to marked mnc in somite 14 (som14) in the epaxial region of two adjacent somites at 4 dpf (B-G) or  
 902 epaxial region of som16 at 3 dpf (H-K). Anterior to left, dorsal up. For clarity, short confocal stacks  
 903 including the marked mnc are shown (B-G) extracted from full somite stacks before (B,C) and after  
 904 (D-G, H-K) wounding. **B,C.** Superficial (B) and deeper (C) images before wounding. Distinct  
 905 fibres present different colours after limited recombination at an early stage, thereby allowing  
 906 unambiguous identification of the region (white arrowhead, white dot). A single EYFP-marked mpc  
 907 (arrow) in som14 identified shortly prior to wounding. Note the presence of red (asterisk) and bright  
 908 (arrowhead) and dim (dot) yellow fibres. **D.** By 2 h post-wounding (hpw), and despite dimming  
 909 caused by the wounding procedure, the marked mnc (arrow) and the yellow fibres (arrowhead and  
 910 dot) perdure in the wounded region (outlined by dashed line). In contrast, the red and bright yellow  
 911 fibres have been lost. **E.** At 1 day post-wound (dpw), fluorescent signal has recovered and several  
 912 bright EYFP-marked cells are detected in the wounded region (arrows). **F.** By 2 dpw, EYFP-marked  
 913 cells are larger and elongating parallel to fibres (arrow) and present in adjacent unwounded somite  
 914 (red arrowhead). **G.** At 3 dpw, the clusters of EYFP-marked mncs are replaced by several EYFP-  
 915 marked fibres (arrows), indicating the extent of clonal contribution to the regenerate. Note the limited  
 916 clonal expansion of the EYFP-marked clone over the three day period and the absence of label  
 917 between the marked fibers (blue arrowheads). **H-K.** A second example showing single optical slices,  
 918 with landmarks identifying wounded somites (white dot and asterisk) and tracking repair of a single  
 919 fibre by fusion of cells from EYFP-marked (yellow arrows) and mCer/marked (cyan arrows) mpcs.  
 920 Rapid purse-string epidermal wound closure is visible 1 hpw (arrowhead). Bars = 50  $\mu$ m.

921

922 **Table 1 Fish alleles**

| Fish Line                                           | References            | Notes                                                              |
|-----------------------------------------------------|-----------------------|--------------------------------------------------------------------|
| <i>Tg(Ola.Actb:Hsa.HRAS-EGFP)<sup>vu119Tg</sup></i> | (Cooper et al., 2005) | Broadly/ubiquitously expressed and anchors EGFP to plasma membrane |
| <i>Tg(BB3mus7)<sup>kg309</sup></i>                  | This work             | Expresses in somitic tissue                                        |
| <i>Tg(BB3weak)<sup>kg309</sup></i>                  | This work             | Expresses weakly throughout body                                   |
| <i>Tg(BB3mus7EYFP)<sup>kg311</sup></i>              | This work             | Recombined <i>kg309</i> allele expressing EYFP                     |
| <i>Tg(BB3mus7mCer)<sup>kg321</sup></i>              | This work             | Recombined <i>kg309</i> allele expressing mCerulean                |
| <i>Tg(BB3mus7only)<sup>kg330</sup></i>              | This work             | Expresses only in somitic tissue                                   |
| <i>Tg(HS:Cre.cryaa:RFP)<sup>kg310</sup></i>         | This work             | Heat shock inducible transgene marked by <i>crya:RFP</i> in lens   |

923

924 **Table 2 Cellular content of Somite 16 at 3 dpf.**

| Somite 16                             | Fraction of nuclei (%) | Number of Cells (number of nuclei) |              |           |              |            |              |
|---------------------------------------|------------------------|------------------------------------|--------------|-----------|--------------|------------|--------------|
|                                       |                        | Epaxial                            |              | Hypaxial  | Total        |            |              |
| Slow mononucleate fibres              | 7                      | 10                                 | (10)         | 13        | (23)         | 23         | (23)         |
| Fast mononucleate fibres              | 3                      | 3                                  | (3)          | 5         | (5)          | 8          | (8)          |
| Fast binucleate fibres                | 13                     | 9                                  | (18)         | 12        | (24)         | 21         | (42)         |
| Fast trinucleate fibres               | 23                     | 11                                 | (33)         | 13        | (39)         | 24         | (72)         |
| Fast tetranucleate fibres             | 22                     | 8                                  | (32)         | 9         | (36)         | 17         | (68)         |
| Fast penta/hexanucleate fibres        | 4                      | 0                                  | (0)          | 2         | (11)         | 2          | (11)         |
| Fast fibres total                     | 64                     | 31                                 | (86)         | 41        | (115)        | 72         | (201)        |
| <b>Total fibres (myotome nuclei)</b>  | <b>72</b>              | <b>41</b>                          | <b>(96)</b>  | <b>54</b> | <b>(128)</b> | <b>95</b>  | <b>(224)</b> |
| Nuclei/fast fibre                     |                        | 2.8                                |              | 2.9       |              | 2.8        |              |
| Nuclei/slow fibre                     |                        | 1.0                                |              | 1.0       |              | 1.0        |              |
| Nuclei/fibre                          |                        | 2.3                                |              | 2.4       |              | 2.4        |              |
| Dermomyotome cells                    | 19                     | 36                                 | (36)         | 24        | (24)         | 60         | (60)         |
| Vertical myoseptum cells*             | 5                      | 16/2=8                             | (8)          | 18/2=9    | (9)          | 34/2=17    | (17)         |
| Horizontal myoseptum cells            | 4                      | -                                  |              | -         |              | 12         | (12)         |
| <b>Total non-fibre cells (nuclei)</b> | <b>28</b>              | <b>44</b>                          | <b>(44)</b>  | <b>33</b> | <b>(33)</b>  | <b>89</b>  | <b>(89)</b>  |
| <b>Somite cells (somite nuclei)</b>   | <b>100</b>             | <b>85</b>                          | <b>(140)</b> | <b>87</b> | <b>(161)</b> | <b>184</b> | <b>(313)</b> |

925

926 A *Tg(Ola.Actb:Hsa.HRAS-EGFP)<sup>vu119Tg</sup>* transgenic fish was injected with H2B-mCherry mRNA and  
 927 somites 15-17 scanned live to generate a high-resolution confocal stack, which was analysed by  
 928 manual annotation of each nucleus in Volocity.

929 \* Cells in vertical myosepta could not be attributed to either flanking somite with confidence and  
 930 therefore half were attributed to somite 16.

931

932

933

934

935

936

937

938

939

940

941 **Table 3 Contribution of marked mncs to wound repair**

| Stage at wounding (dpf <sup>#</sup> ) | Wound location (somite number) | Marked mncs prior to wounding (number <sup>§</sup> ) | Regeneration analysed (dpw) | Marked regenerated fibers (number*) |
|---------------------------------------|--------------------------------|------------------------------------------------------|-----------------------------|-------------------------------------|
| 3                                     | 6                              | Unrecorded                                           | 4                           | 2 or 3                              |
| 3                                     | 19                             | 2 to 3                                               | 3                           | 2                                   |
| 3                                     | 22                             | 3 to 4                                               | 1                           | 4                                   |
|                                       |                                |                                                      | 2                           | + 2 additional fibres               |
|                                       |                                |                                                      | 3                           | + 2 extra thin fibres               |
|                                       |                                |                                                      | 3                           | = 8 in fibres total                 |
| 3                                     | 13-16                          | 2 to 3                                               | 3                           | 2 to 3                              |
| 3                                     | 18-20                          | 3 to 4                                               | 1                           | 2                                   |
| 4                                     | 15 (+14 partially)             | > 4                                                  | 3                           | 2 to 3                              |
| 4                                     | 14                             | 2 to 3                                               | 1                           | 3 to 4                              |
|                                       |                                |                                                      | 2                           | bigger and brighter                 |
|                                       |                                |                                                      |                             | + 4 additional fibres               |
|                                       |                                |                                                      | 3                           | bigger and brighter                 |
|                                       |                                |                                                      |                             | + at least 5 additional fibres      |
|                                       |                                |                                                      | 3                           | = 12 or 13 fibres total             |

942 <sup>#</sup> Seven fish from separate lays were wounded near marked mncs on different dates over a 5 month  
 943 period. The wounded region was tracked over subsequent days by 4D confocal microscopy.

944 <sup>§</sup> When mncs touch it is not possible to be sure of the number.

945 \* When marked fibres align parallel and adjacent it was sometimes hard to be sure of their number.

946

947

948

949

950 **Supplementary Data.**

951

952 **Fig. S1. Generation of the *kg330* allele.** Linked BB3 insertions in *kg309* yield distinct patterns of  
 953 recombination. When four independent female *BB3mus7<sup>kg309/+</sup>;HS:Cre.cryaa:RFP<sup>kg310</sup>* fish were  
 954 outcrossed to wild type fish, only 182/571 (32%) of progeny lacked fluorescence (excluding lens  
 955 RFP), a highly significant difference from both the predicted 50% for a single transgene insertion  
 956 ( $p = 9.0E-10$ ,  $X^2$  test) and the 25% expected for two (or <25% for more than two) separate unlinked  
 957 transgenes ( $p = 1.5E-4$ ,  $X^2$  test) indicating two linked BB3 insertions in the *BB3mus7<sup>kg309</sup>* allele.  
 958 Female germline Cre expression leads to non-mosaic recombination yielding several distinct  
 959 patterns of fluorescent protein expression at each linked BB3 locus. **A.** Recombination of the  
 960 *BB3mus7* transgene yielded strong myotomal EYFP expression (arrow). A second separable  
 961 insertion yielded widespread low-level EYFP (*BB3weak*) expression in most tissues including brain,

962 eye, heart, epidermis and gut (arrowheads). Such fish never express mCer (lower panel). **B.** Many  
963 fish lacked fluorescence altogether, revealing the background autofluorescence level. **C,D.** Less  
964 frequently, individuals recombined at *BB3mus7* to give myotomal mCer expression (arrows) either  
965 alone (C lower fish and D) or in combination with *BB3weak* EYFP (C upper fish). Note the presence  
966 of *BB3weak* signal (filled arrowheads) in head of the upper individual, but not of the lower individual  
967 (open arrowheads) and *BB3mus7* mCer in both upper (arrow) and lower (blue arrows) larvae. **E.**  
968 Individuals with only the *BB3weak* EYFP were numerous. Note the contrast of the weak signal in  
969 trunk in this enhanced imaged compared with the *BB3mus7EYFP, BB3weakEYFP* transgenic in  
970 panel A. **F.** Frequency of each genotype indicating genetic linkage and recombination dynamics.  
971 Note that *BB3mus7* transmitted to 274/571 (48%) of progeny, as expected for a single heterozygous  
972 Mendelian locus ( $p = 0.34$ ,  $X^2$  test). Lack of mCer recombination at the *BB3weak* locus suggests  
973 genetic interference, supporting linkage of *BB3mus7* and *BB3weak*. **G.** Outcrossing of *kg309* (tdT  
974 expression shown in the upper individual) permitted separation on the basis of the tdTomato of  
975 *BB3mus7* and *BB3weak* to isolate the *BB3mus7only kg330* allele (lower larva). Note the widespread  
976 weak tdT signal in head and gut of *BB3mus7<sup>kg309</sup>* (arrowheads) and its reduction in *BB3mus7<sup>kg330</sup>*  
977 compared to the *BB3mus7* myotomal signal (arrows). **H.** Lateral views of single *BB3mus7<sup>kg330</sup>* and  
978 *HS:Cre.cryaa:RFP<sup>kg310</sup>* fish at 6 dpf showing the distinct RFP and tdT signal and the low mCer and  
979 EYFP background in somites of unrecombined Musclebow.

980

981 **Fig. S2. Regional correlation of myogenesis from marked mnCs.** Change in number of marked  
982 fibres (upper graphs) and mnCs (lower charts) in each region of six single somites analysed at both  
983 3 and 6 dpf, from same dataset shown in Fig. 3C. **A.** Similar behaviour in epaxial and hypaxial  
984 somitic regions. **B.** Dispersion of largely superficial mnCs into deeper regions. Colours indicate final  
985 location at 6 dpf.

986

987

988 **Movie S1. Stability of Musclebow labelling on short timescales.**

989 *Tg(BB3mus7)<sup>kg309</sup>;Tg(HS:Cre.cryaa:RFP)<sup>kg310</sup>* embryo was subjected to 5 min heat-shock at 30%  
990 epiboly. After embedding in 3% methylcellulose with light tricaine at 26 hpf, 15 sequential confocal  
991 time-lapse 3-colour 3-tile 2  $\mu\text{m}$  stacks were taken every 24 min over 6 h at 24°C. An 11-slice mip of  
992 each stack is shown.

993

994 **Movie S2. Rotation of healed wound.**

995 *Tg(BB3mus7)<sup>kg309</sup>;Tg(HS:Cre.cryaa:RFP)<sup>kg310</sup>* embryo was subjected to 5 min heat-shock at 24 hpf,  
996 a selected region containing a marked mnc wounded at 4 dpf and allowed to regenerate for 3 days  
997 while repeatedly observed (also shown in Fig. 6B-F). A 2-colour confocal stack at 3 dpw (top) was  
998 segmented (bottom) to reveal the marked-mnc-derived regenerated fibres in som14.

999

1000

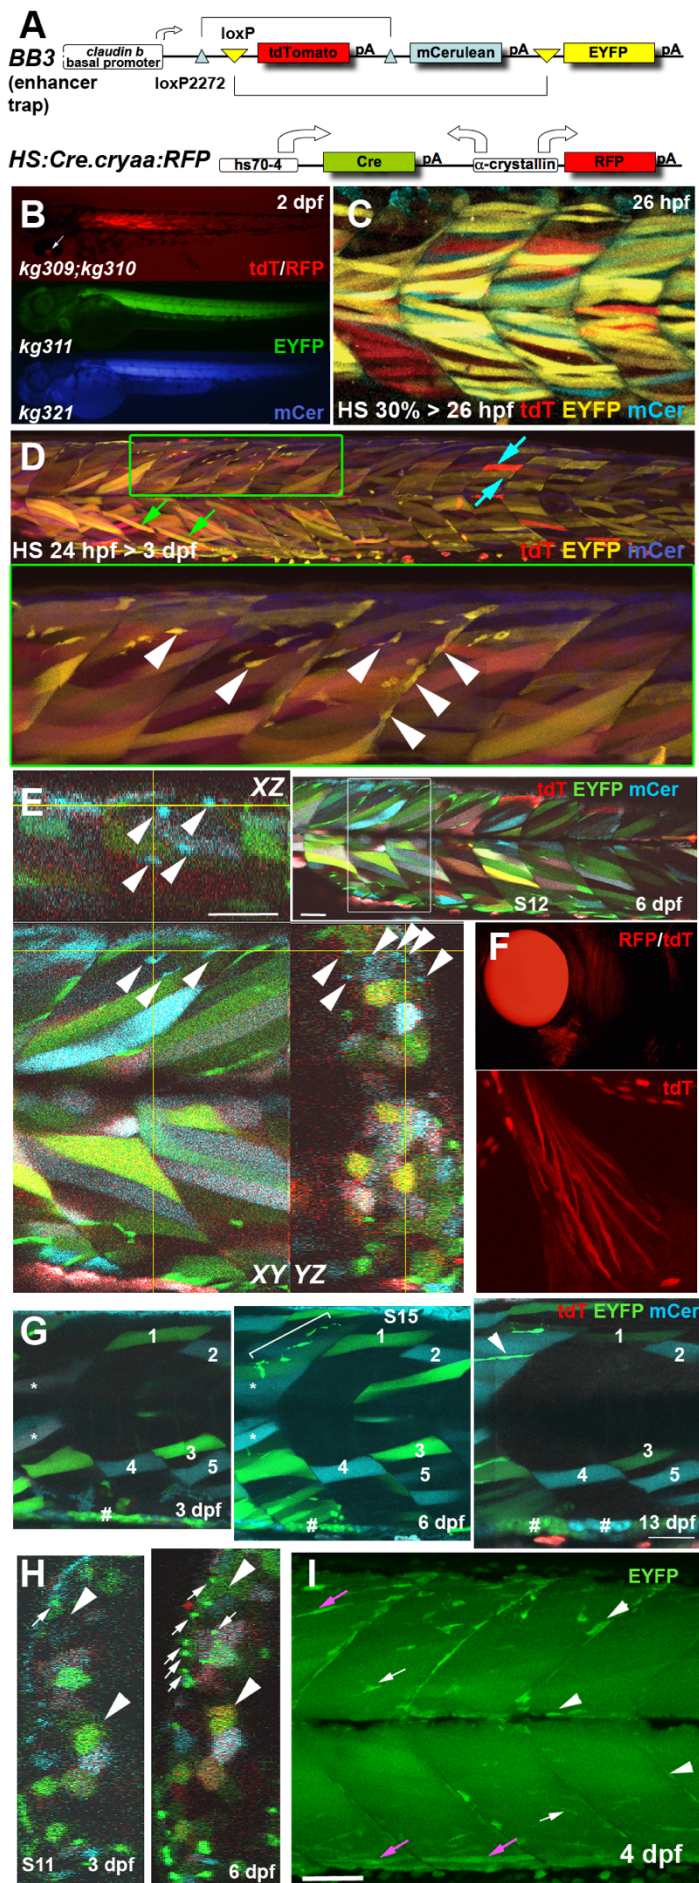

**Fig. 1. Musclebow fish allow genetic marking of muscle fibres and their precursor cells.**

Transgenic Musclebow fish were selected from an enhancer trap screen with larvae at the indicated stages shown in lateral views with anterior to left, dorsal up. **A.** The BB3 and HS:Cre.cryaa:RFP DNA constructs used for making transgenic fish. **B.** Dissecting scope view of *BB3mus7<sup>kg309</sup>* yielding tdTomato detectable in a subset of muscle fibres from 1 dpf and *HS:Cre.cryaa:RFP<sup>kg310</sup>* yields RFP in lens from 2 dpf (arrow, top). Germline activity of *HS:Cre.cryaa:RFP<sup>kg310</sup>* yielded lines *BB3mus7:EYFP<sup>kg311</sup>* (EYFP, middle) or *BB3mus7:mCerulean<sup>kg321</sup>* (mCer, bottom) expressing throughout muscle tissue. **C.** Maximum intensity projection confocal stack (mip) after heat shock at 30% epiboly yielding subsets of fibres expressing one or two recombined and unrecombined alleles, presumably reflecting mosaic Cre action followed by fusion of mpcs expressing *BB3mus7* in different recombination states. Note that recombination yielded EYFP fibres more frequently than mCer fibres and that some fibres remain unlabelled. **D.** Three channel confocal mip stack showing *BB3mus7* expression at 3 dpf in morphological slow (cyan arrows) and fast (green arrows) fibres and in mncs (arrowheads) in somites.

39 Note the clustered mncs (green box, short stack shown magnified beneath). **E.** Single cluster of  
40 mCer-marked mncs (arrowheads) in somite 9. Yellow crosshairs indicate planes in XY, YZ and XZ  
41 projections. Inset shows location of cluster (white box). Note absence of mCer mncs in rest of plane.  
42 **F.** *BB3mus7* expression in pectoral fin muscles. **G.** Time-lapse analysis of short 20  $\mu$ m stack mips  
43 showing the persistent set of marked fibres (numbered) in the deep region of somites 15 and 16 at  
44 3, 6 and 13 dpf. The 6 dpf stack extends further superficially within the myotome than the 3 and  
45 13 dpf stacks. A cluster of mncs (bracket) appears in the deep myotome between 3 and 6 dpf and  
46 forms a nascent fibre (arrowhead) by 13 dpf. Note the loss of tdT in dual labelled fibres (asterisks)  
47 and the clonal growth of gut-associated cells (hashes). **H.** Time-lapse analysis of somite 11 shows  
48 maintenance of overall pattern of fibre labelling but changes in colour of some fibres (arrowheads).  
49 Note dramatic increase in EYFP-marked superficial mncs (arrows) in this somite which correlates  
50 with accumulation of extra EYFP-marked fibres (upper arrowheads). **I.** Confocal maximum intensity  
51 projection of 4 dpf *BB3mus7:EYFP<sup>kg311</sup>* larva with strong near-uniform signal in myotomal fibres and  
52 stronger signal in some mncs on myosepta (arrows) or within the myotome (arrowheads). Note the  
53 strongly-marked nascent fibres (magenta arrows). Bars = 50  $\mu$ m.  
54



Fig. 2

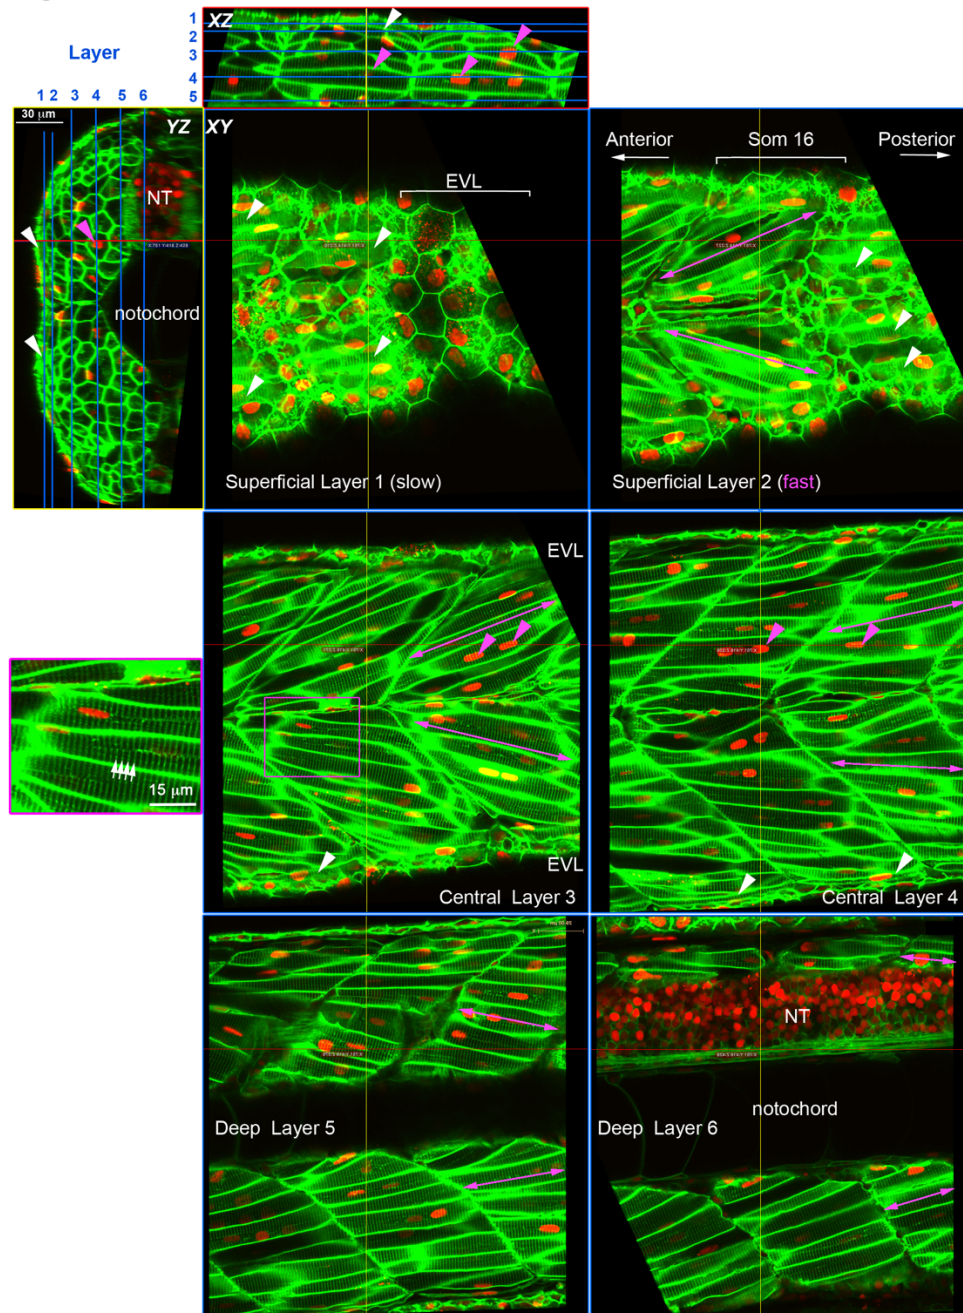

55

56 **Fig. 2. Cell content of the growing zebrafish somite.**

57 Larvae expressing membrane-localized EGFP and injected with RNA encoding H2B-mCherry were  
58 selected for brightness of both labels and scanned live at high resolution using a sub-Airy pinhole.  
59 Three orthogonal views are shown, with blue lines on XZ and YZ projections indicating the six sagittal  
60 XY planes. Red and yellow lines indicate the XZ and YZ plane, respectively. Note that EGFP labels  
61 the transverse T-tubule system (white arrows) in muscle fibres at regular 2 µm spacing orthogonal  
62 to the long axis of the fibre (purple box, magnified at left). Mononucleated fibres parallel to the  
63 anteroposterior axis on the surface of the myotome (white arrowheads) are superficial slow fibres.  
64 Fast fibres with multiple nuclei (magenta arrowheads) show different orientation depending on the  
65 depth within the myotome (magenta arrows); superficially they 'point' anteriorly, but in the medial  
66 myotome they 'point' posteriorly. NT neural tube.

### Fig. 3

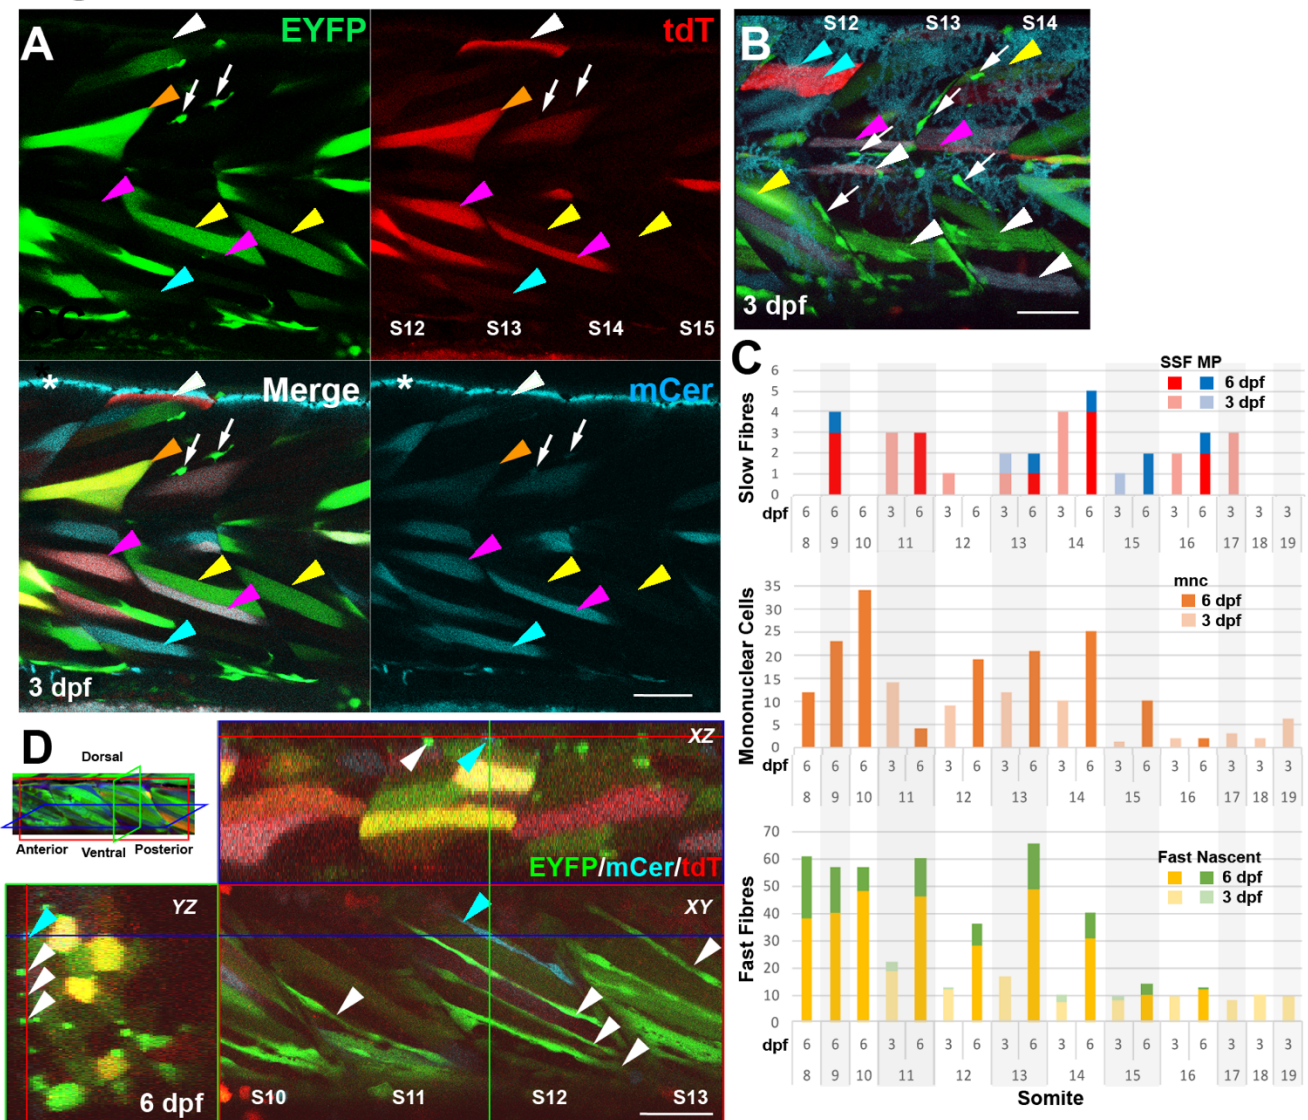

67

68

69

70

71

72

73

74

75

76

77

78

79

80

81

82

**Fig. 3. *BB3mus7* recombination reveals dynamics of mpc clones.** Live confocal microscopy of *BB3mus7<sup>kg309/+</sup>; HS:Cre.cryaa:RFP<sup>kg310/+</sup>* embryos after heat-shock at 24 hpf. **A.** Three channel confocal slice showing *BB3mus7* expression in somites 12-15 at 3 dpf in morphological slow (white arrowheads) and fast (other arrowheads) fibres and in mncs (white arrows) in somites. Note the clustered mncs. Examples of individual fibres marked by tdT-only (white arrowheads), EYFP-only (yellow arrowheads), mCer-only (cyan arrowheads), EYFP and tdT (orange arrowheads) and mCer and tdT (magenta arrowheads). Asterisk indicates autofluorescence from xanthophores in the mCer channel. Faint breakthrough of bright EYFP signal into the mCer detection channel that can be seen, for example, in the mncs and the fibre indicated by the orange arrowhead is readily distinguished from genuine mCer. **B.** Short stack (22  $\mu$ m) mip of somites 12-14 at 3 dpf showing recombined mncs (arrows), superficial slow fibres (white arrowheads), muscle pioneers (magenta arrowheads), fast fibres (yellow arrowheads) and unrecombined slow fibres (cyan arrowheads). Note that some fibres contain both tdT and mCer or EYFP proteins, indicating perdurance of tdT after Cre-driven recombination. **C.** Quantification of numbers of marked cells in individual somites of a single fish at 3 and 6 dpf, determined from high-resolution confocal stacks. Only somites 11-16 were

83 scored at both timepoints. SSF, superficial slow fibre; MP, muscle pioneer slow fibre; mnc,  
84 mononuclear non-fibre cell; Fast, fast fibre with T-tubules; Nascent, thin nascent fibre spanning  
85 anteroposterior extent of somite. **D.** XYZ slice projections (indicated on mip at top left) of somites 10-  
86 13 at 6 dpf showing reduction in mncs and increase in elongated cells spanning the myotome marked  
87 with EYFP (white arrowheads) or mCer (blue arrowheads) within the hypaxial myotome. Coloured  
88 crosshairs indicate the plane of the orthogonal boxed optical sections. Bars = 50  $\mu$ m.  
89

## Fig. 4

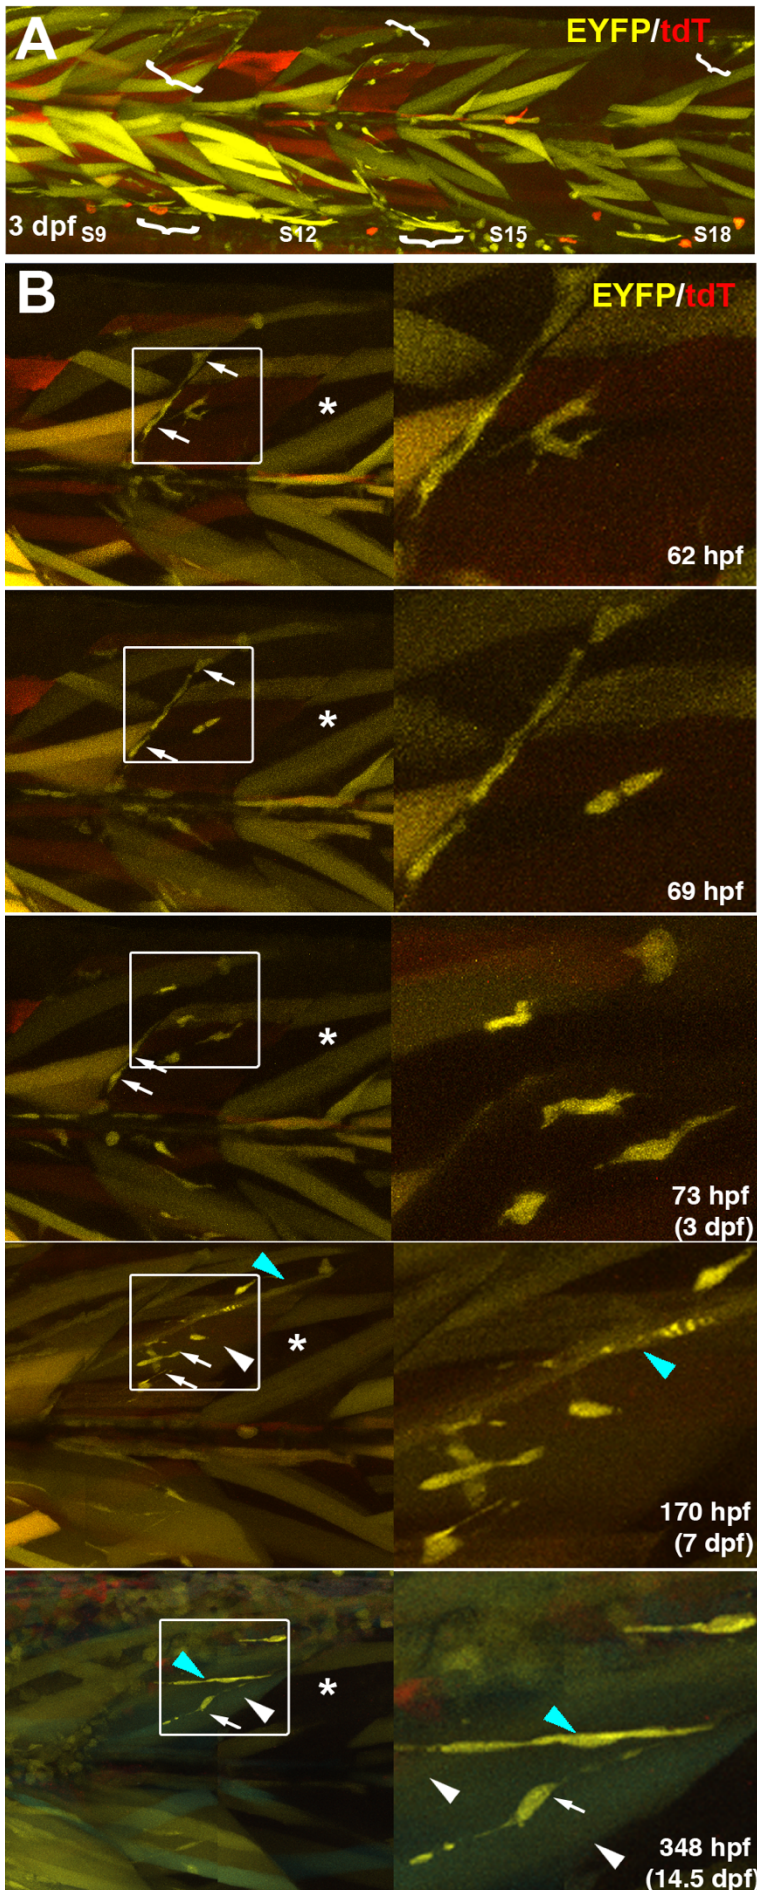

**Fig. 4. Kinetics of proliferation and differentiation of an EYFP-marked mnc cluster.** Time-lapse series taken from full somite three channel confocal stacks of a single Musclebow marked fish after heat-shock at 24 hpf. **A.** Full somite stack mip of tile scan of somites 9-18 showing five clusters of EYFP-marked mncs (brackets) at 3 dpf. Note the large areas lacking marked mncs and the more numerous marked fibres in anterior somites. **B.** Time-lapse confocal mips showing development of the mnc cluster in somite 14 of panel A. Boxes shown magnified at right. Note the i) early presence and later absence of EYFP-marked mncs on the vertical myoseptum (arrows), ii) increase in number of marked mncs, nascent fibres (blue arrowheads) and large fibres (white arrowheads) in the body of the myotome and iii) lack of increase in marked fibres in the adjacent region of somite 15 that also lacked marked mncs (asterisks).

## Fig. 5

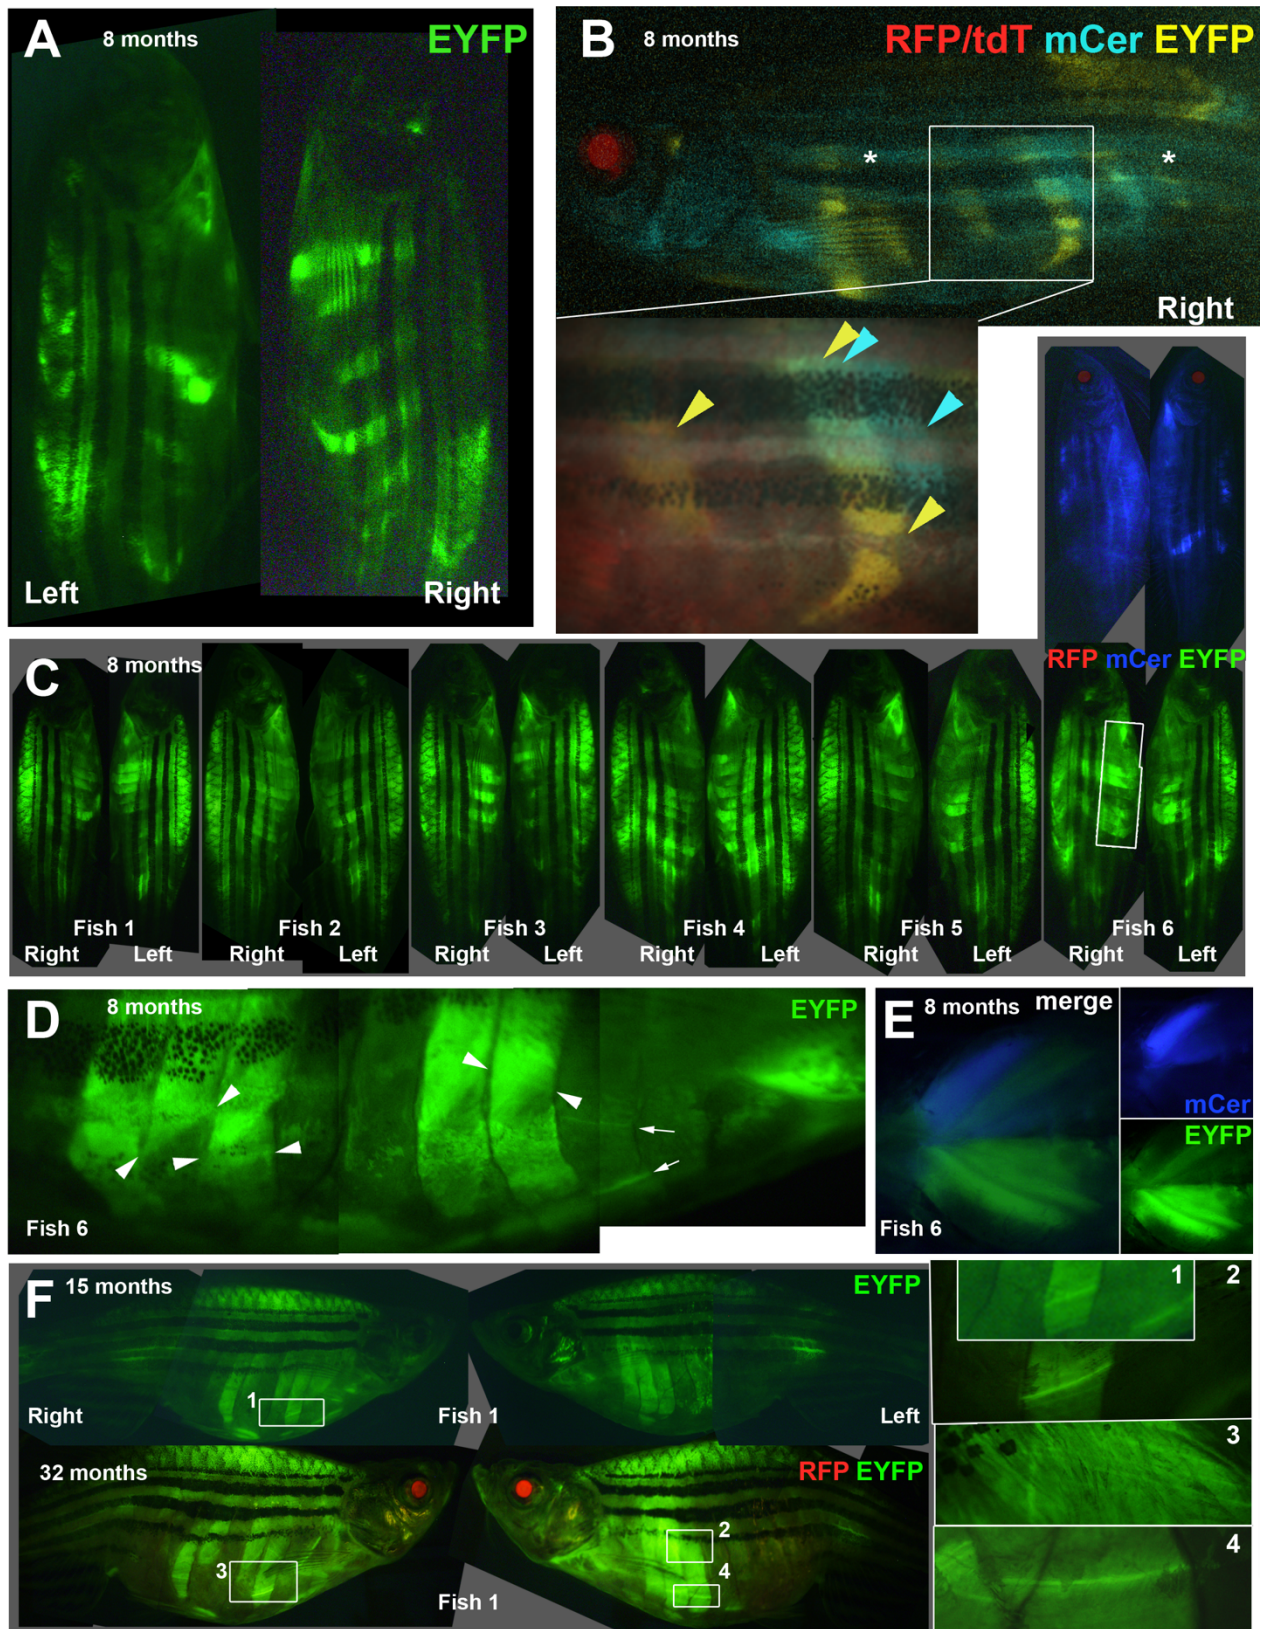

115

116

117

118

**Fig. 5. Stable clonal growth of muscle perdures throughout life.** A,B. Single 8 month adult Musclebow-marked fish that were heat-shocked for 5 min at 37°C at 30% epiboly show distinct patterns of EYFP-marked myotomes on left and right side and between epaxial and hypaxial somite

119 (A). When the right side of the same fish was imaged for all four fluorescent proteins, this fish had  
120 faint tdT throughout muscle and RFP in lens, indicating Cre expression, that had triggered clonal  
121 marking of several half somites in either EYFP or mCer. Asterisks indicate background blue  
122 autofluorescence from xanthophores. Box, magnified in inset, shows regions of hypaxial myotomes  
123 11 and 14 marked by EYFP, whereas a region of somite 15 near the HZM is marked by mCer only.  
124 In a similar region of myotome 14, muscle is marked by both mCer and EYFP. **C-E.** Eight month  
125 old adult Musclebow-marked *BB3mus7* siblings (C) that were heatshocked for 5 min at 39°C at  
126 24 hpf. Note the similar size but lower frequency of mCer clones compared to EYFP clones in Fish  
127 6. Boxed region, magnified in D, reveals layers of fibres with distinct orientations (fibre ends  
128 indicated by pairs of arrowheads) and individual marked fibres (arrows). Ventral view of pectoral fin  
129 region of Fish 6 (E). **F.** Fish 1 from C at 15 and 32 months of age showing similar clonal pattern.  
130 Numbered boxes are magnified at right. Bar = 50  $\mu$ m.

131

132

133

134

**Fig. 6**

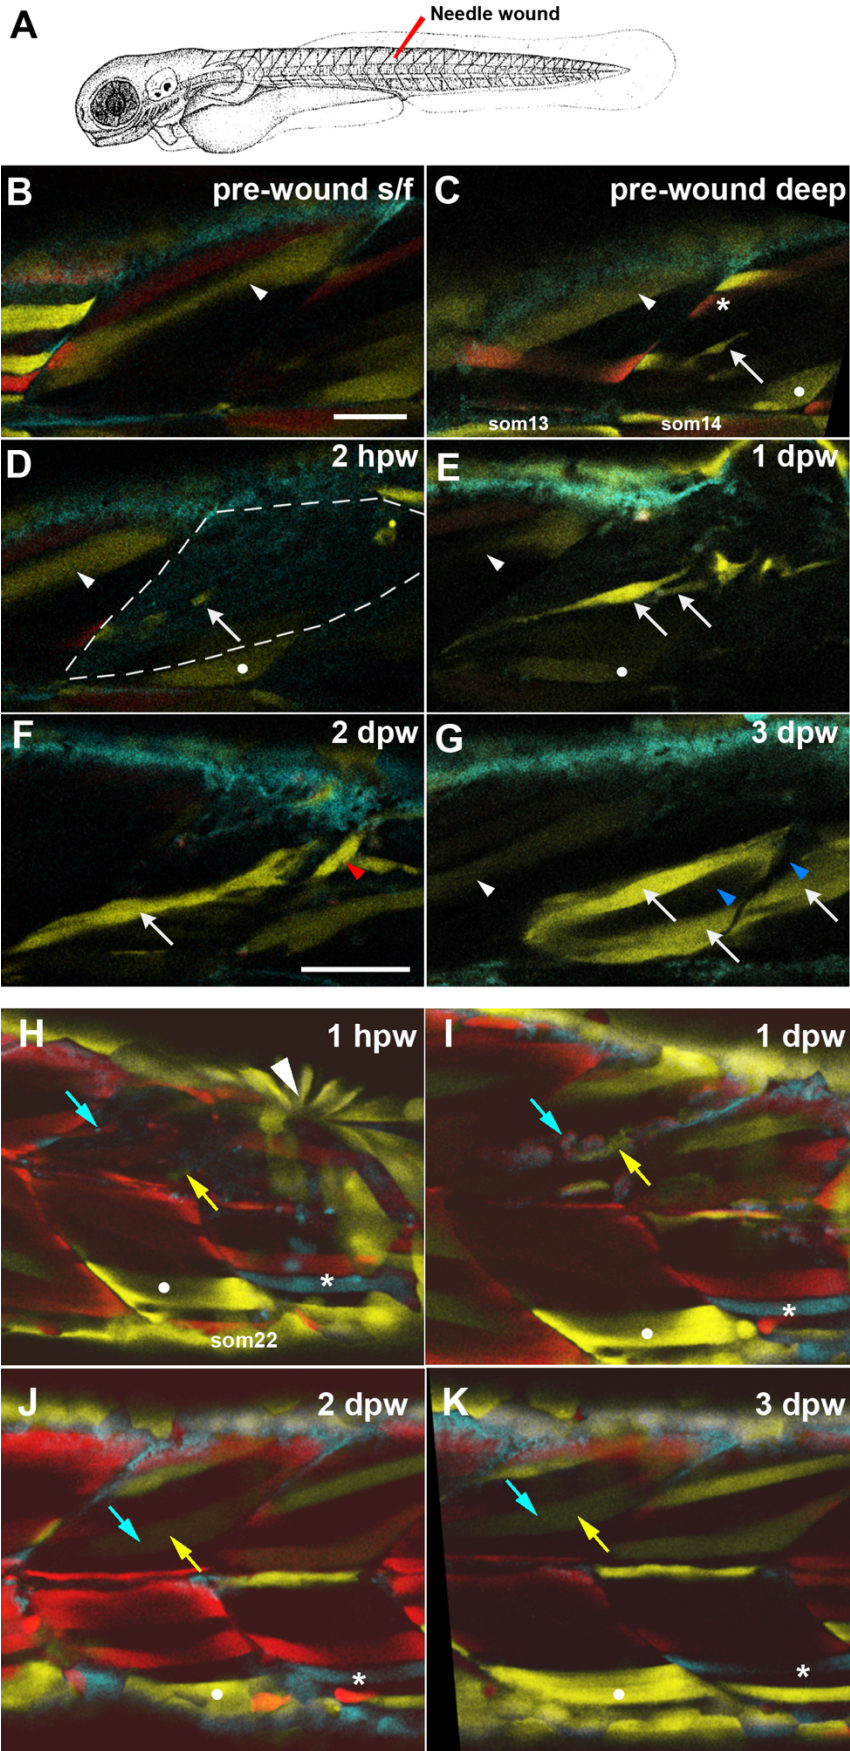

137 **Fig. 6. Partial contribution of clones to wound repair in zebrafish muscle.** **A.** Schematic of  
 138 wounding procedure (modified from (Kimmel et al., 1995)). A small needle wound was made near  
 139 to marked mnc in somite 14 (som14) in the epaxial region of two adjacent somites at 4 dpf (B-G) or  
 140 epaxial region of som16 at 3 dpf (H-K). Anterior to left, dorsal up. For clarity, short confocal stacks  
 141 including the marked mnc are shown (B-G) extracted from full somite stacks before (B,C) and after  
 142 (D-G, H-K) wounding. **B,C.** Superficial (B) and deeper (C) images before wounding. Distinct  
 143 fibres present different colours after limited recombination at an early stage, thereby allowing  
 144 unambiguous identification of the region (white arrowhead, white dot). A single EYFP-marked mpc  
 145 (arrow) in som14 identified shortly prior to wounding. Note the presence of red (asterisk) and bright  
 146 (arrowhead) and dim (dot) yellow fibres. **D.** By 2 h post-wounding (hpw), and despite dimming  
 147 caused by the wounding procedure, the marked mnc (arrow) and the yellow fibres (arrowhead and  
 148 dot) perdure in the wounded region (outlined by dashed line). In contrast, the red and bright yellow  
 149 fibres have been lost. **E.** At 1 day post-wound (dpw), fluorescent signal has recovered and several  
 150 bright EYFP-marked cells are detected in the wounded region (arrows). **F.** By 2 dpw, EYFP-marked  
 151 cells are larger and elongating parallel to fibres (arrow) and present in adjacent unwounded somite  
 152 (red arrowhead). **G.** At 3 dpw, the clusters of EYFP-marked mncs are replaced by several EYFP-  
 153 marked fibres (arrows), indicating the extent of clonal contribution to the regenerate. Note the limited  
 154 clonal expansion of the EYFP-marked clone over the three day period and the absence of label  
 155 between the marked fibers (blue arrowheads). **H-K.** A second example showing single optical slices,  
 156 with landmarks identifying wounded somites (white dot and asterisk) and tracking repair of a single  
 157 fibre by fusion of cells from EYFP-marked (yellow arrows) and mCer/marked (cyan arrows) mpcs.  
 158 Rapid purse-string epidermal wound closure is visible 1 hpw (arrowhead). Bars = 50  $\mu$ m.

159

160 **Table 1 Fish alleles**

| Fish Line                                           | References            | Notes                                                              |
|-----------------------------------------------------|-----------------------|--------------------------------------------------------------------|
| <i>Tg(Ola.Actb:Hsa.HRAS-EGFP)<sup>vu119Tg</sup></i> | (Cooper et al., 2005) | Broadly/ubiquitously expressed and anchors EGFP to plasma membrane |
| <i>Tg(BB3mus7)<sup>kg309</sup></i>                  | This work             | Expresses in somitic tissue                                        |
| <i>Tg(BB3weak)<sup>kg309</sup></i>                  | This work             | Expresses weakly throughout body                                   |
| <i>Tg(BB3mus7EYFP)<sup>kg311</sup></i>              | This work             | Recombined <i>kg309</i> allele expressing EYFP                     |
| <i>Tg(BB3mus7mCer)<sup>kg321</sup></i>              | This work             | Recombined <i>kg309</i> allele expressing mCerulean                |
| <i>Tg(BB3mus7only)<sup>kg330</sup></i>              | This work             | Expresses only in somitic tissue                                   |
| <i>Tg(HS:Cre.cryaa:RFP)<sup>kg310</sup></i>         | This work             | Heat shock inducible transgene marked by <i>crya:RFP</i> in lens   |

161



162 **Table 2 Cellular content of Somite 16 at 3 dpf.**

| Somite 16                             | Fraction of nuclei (%) | Number of Cells (number of nuclei) |              |           |              |            |              |
|---------------------------------------|------------------------|------------------------------------|--------------|-----------|--------------|------------|--------------|
|                                       |                        | Epaxial                            |              | Hypaxial  |              | Total      |              |
| Slow mononucleate fibres              | 7                      | 10                                 | (10)         | 13        | (13)         | 23         | (23)         |
| Fast mononucleate fibres              | 3                      | 3                                  | (3)          | 5         | (5)          | 8          | (8)          |
| Fast binucleate fibres                | 13                     | 9                                  | (18)         | 12        | (24)         | 21         | (42)         |
| Fast trinucleate fibres               | 23                     | 11                                 | (33)         | 13        | (39)         | 24         | (72)         |
| Fast tetranucleate fibres             | 22                     | 8                                  | (32)         | 9         | (36)         | 17         | (68)         |
| Fast penta/hexanucleate fibres        | 4                      | 0                                  | (0)          | 2         | (11)         | 2          | (11)         |
| Fast fibres total                     | 64                     | 31                                 | (86)         | 41        | (115)        | 72         | (201)        |
| <b>Total fibres (myotome nuclei)</b>  | <b>72</b>              | <b>41</b>                          | <b>(96)</b>  | <b>54</b> | <b>(128)</b> | <b>95</b>  | <b>(224)</b> |
| Nuclei/fast fibre                     |                        | 2.8                                |              | 2.9       |              | 2.8        |              |
| Nuclei/slow fibre                     |                        | 1.0                                |              | 1.0       |              | 1.0        |              |
| Nuclei/fibre                          |                        | 2.3                                |              | 2.4       |              | 2.4        |              |
| Dermomyotome cells                    | 19                     | 36                                 | (36)         | 24        | (24)         | 60         | (60)         |
| Vertical myoseptum cells*             | 5                      | 16/2=8                             | (8)          | 18/2=9    | (9)          | 34/2=17    | (17)         |
| Horizontal myoseptum cells            | 4                      | -                                  |              | -         |              | 12         | (12)         |
| <b>Total non-fibre cells (nuclei)</b> | <b>28</b>              | <b>44</b>                          | <b>(44)</b>  | <b>33</b> | <b>(33)</b>  | <b>89</b>  | <b>(89)</b>  |
| <b>Somite cells (somite nuclei)</b>   | <b>100</b>             | <b>85</b>                          | <b>(140)</b> | <b>87</b> | <b>(161)</b> | <b>184</b> | <b>(313)</b> |

163

164 A *Tg(Ola.Actb:Hsa.HRAS-EGFP)<sup>vu119Tg</sup>* transgenic fish was injected with H2B-mCherry mRNA and  
 165 somites 15-17 scanned live to generate a high-resolution confocal stack, which was analysed by  
 166 manual annotation of each nucleus in Volocity.

167 \* Cells in vertical myosepta could not be attributed to either flanking somite with confidence and  
 168 therefore half were attributed to somite 16.

169

170 **Table 3 Contribution of marked mncs to wound repair**

| Stage at wounding (dpf <sup>#</sup> ) | Wound location (somite number) | Marked mncs prior to wounding (number <sup>§</sup> ) | Regeneration analysed (dpw) | Marked regenerated fibers (number*) |
|---------------------------------------|--------------------------------|------------------------------------------------------|-----------------------------|-------------------------------------|
| 3                                     | 6                              | Unrecorded                                           | 4                           | 2 or 3                              |
| 3                                     | 19                             | 2 to 3                                               | 3                           | 2                                   |
| 3                                     | 22                             | 3 to 4                                               | 1                           | 4                                   |
|                                       |                                |                                                      | 2                           | + 2 additional fibres               |
|                                       |                                |                                                      | 3                           | + 2 extra thin fibres               |
|                                       |                                |                                                      | 3                           | = 8 in fibres total                 |
| 3                                     | 13-16                          | 2 to 3                                               | 3                           | 2 to 3                              |
| 3                                     | 18-20                          | 3 to 4                                               | 1                           | 2                                   |
| 4                                     | 15 (+14 partially)             | > 4                                                  | 3                           | 2 to 3                              |
| 4                                     | 14                             | 2 to 3                                               | 1                           | 3 to 4                              |
|                                       |                                |                                                      | 2                           | bigger and brighter                 |
|                                       |                                |                                                      |                             | + 4 additional fibres               |
|                                       |                                |                                                      | 3                           | bigger and brighter                 |
|                                       |                                |                                                      |                             | + at least 5 additional fibres      |
|                                       |                                |                                                      | 3                           | = 12 or 13 fibres total             |

171 <sup>#</sup> Seven fish from separate lays were wounded near marked mncs on different dates over a 5 month  
 172 period. The wounded region was tracked over subsequent days by 4D confocal microscopy.

173 <sup>§</sup> When mnps touch it is not possible to be sure of the number.

174 \* When marked fibres align parallel and adjacent it was sometimes hard to be sure of their number.

175

176

177

178

179 **Cooper, M. S., Szeto, D. P., Sommers-Herivel, G., Topczewski, J., Solnica-Krezel, L., Kang, H.**  
 180 **C., Johnson, I. and Kimelman, D.** (2005). Visualizing morphogenesis in transgenic  
 181 zebrafish embryos using BODIPY TR methyl ester dye as a vital counterstain for GFP. *Dev*  
 182 *Dyn* **232**, 359-368.

183 **Kimmel, C. B., Ballard, W. W., Kimmel, S. R., Ullmann, B. and Schilling, T. F.** (1995). Stages  
 184 of embryonic development of the zebrafish. *Developmental Dynamics* **203**, 253-310.

185
